# Supplementary material for: Hydration of alkynes catalyzed by [Au(X)(L)(ppy)]X in the green solvent γ-valerolactone under acid-free conditions: the importance of the pre-equilibrium step
Source: Royal Society of Chemistry journal article supplement (doi:10.1039/d0cy01343a), 2020-01-01
Supplement: d0cy01343a1.pdf [file d0cy01343a1.pdf]

# Hydration of Alkynes Catalyzed by $[\text{AuX}(\text{L})(\text{ppy})]\text{X}$ in the Green Solvent $\gamma$ -Valerolactone under Acid-Free Conditions: the Importance of the Pre-equilibrium Step

*Jacopo Segato,[a] Alessandro Del Zotto,[a] Leonardo Belpassi,[b] Paola Belanzoni,[b][c]\*, Daniele Zuccaccia,[a]\**

*[a] Dipartimento di Scienze Agroalimentari, Ambientali e Animali, Sezione di Chimica, Università di Udine, Via Cotonificio 108, I-33100 Udine, Italy. E-mail: daniele.zuccaccia@uniud.it*

*[b] Istituto di Scienze e Tecnologie Chimiche (SCITEC), Consiglio Nazionale delle Ricerche c/o Dipartimento di Chimica, Biologia e Biotecnologie, Università degli Studi di Perugia, Via Elce di Sotto 8, 06123 Perugia, Italy*

*[c] Department of Chemistry, Biology and Biotechnology, University of Perugia, via Elce di Sotto 8, 06123 Perugia, Italy. E-mail: paola.belanzoni@unipg.it*

## SUPPORTING INFORMATION

### SUMMARY:

1. GENERAL PROCEDURES AND MATERIALS
2. SYNTHESIS
3. CATALYSIS
  - 3.1 Structure effect
  - 3.2 Role of additive and KIE (Kinetic Isotopic Effect)
  - 3.3 Temperature effect
  - 3.4 Concentration
4. STABILITY STUDY
  - 4.1  $[\text{AuCl}(\text{NHC})(\text{ppy})]\text{Cl}$  (**1**)
  - 4.2  $[\text{AuCl}(\text{PPh}_3)(\text{ppy})]\text{OTf}$  (**2**)
5. NMR SPECTRA
  - 5.1  $[\text{AuCl}_2(\text{ppy})]$
  - 5.2  $[\text{AuCl}(\text{NHC})(\text{ppy})]\text{Cl}$  (**1**)
  - 5.3  $[\text{AuCl}(\text{PPh}_3)(\text{ppy})]\text{OTf}$  (**2**)
  - 5.4  $[\text{Au}(\text{H}_2\text{O})(\text{NHC})(\text{ppy})](\text{BF}_4)_2$  (**3**)
6. COMPUTATIONAL DETAILS

## 1. GENERAL PROCEDURES AND MATERIALS

NaAuCl<sub>4</sub>·H<sub>2</sub>O, phenylpyridine, 3-hexyne,  $\gamma$ -valerolactone, silver triflate (AgOTf), tosylate (AgOTs), trifluoroacetate (AgTFA), tetrafluoroborate (AgBF<sub>4</sub>), and acetate (AgOAc) were purchased from Sigma Aldrich. All the solvents were used as received without any further purification, unless otherwise stated.

## 2. SYNTHESIS

1,3-bis(diisopropylphenyl)imidazolium chloride (NHC·HCl)<sup>1</sup> and dichlorophenylpyridinegold(III) were synthesized according to the literature.<sup>2</sup> All compounds were characterized in solution by <sup>1</sup>H, <sup>13</sup>C, <sup>19</sup>F, and <sup>31</sup>P NMR spectroscopies. NMR spectra were recorded on Avance III HD spectrometers. Chemical shifts (ppm) are relative to TMS for both <sup>1</sup>H and <sup>13</sup>C nuclei, whereas <sup>31</sup>P, <sup>19</sup>F, and <sup>15</sup>N chemical shifts are referenced to 85% H<sub>3</sub>PO<sub>4</sub>, CCl<sub>3</sub>F and CH<sub>3</sub>NO<sub>2</sub>, respectively. The elemental analyses were carried out with a Carlo Erba 1106 elemental analyzer.

### [AuCl<sub>2</sub>(ppy)]

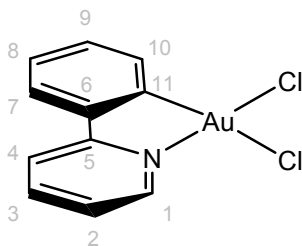

In a Schlenk flask, an acetonitrile solution (1.6 mL) of 2-phenylpyridine (1.0 mmol) was added dropwise, under vigorous stirring, to 1 mmol of NaAuCl<sub>4</sub>·2H<sub>2</sub>O dissolved in 8 mL of water. A bright yellow powder was instantly formed. After 4 hours, the solid was filtered off and dried under vacuum, then it was put in an oven at 165°C for 12 h. The yield of the complex was 76% and it was further used without any purification.

<sup>1</sup>H NMR (400 MHz, DMSO-*d*<sub>6</sub>, 298 K)  $\delta$ (ppm) 9.54 (d, 1H, <sup>3</sup>J<sub>HH</sub> = 6.0 Hz, H1), 8.44 – 8.37 (m, 2H, H3,4), 7.97 (dd, 1H, <sup>3</sup>J<sub>HH</sub> = 7.7, <sup>4</sup>J<sub>HH</sub> = 1.7 Hz, H7), 7.83 (dd, 1H, <sup>3</sup>J<sub>HH</sub> = 8.1, <sup>4</sup>J<sub>HH</sub> = 1.1 Hz, H10), 7.78 (td, 1H <sup>3</sup>J<sub>HH</sub> = 5.9, <sup>4</sup>J<sub>HH</sub> = 3.3 Hz, H2), 7.48 (td, 1H, <sup>3</sup>J<sub>HH</sub> = 7.5, <sup>4</sup>J<sub>HH</sub> = 1.2 Hz, H8), 7.39 (td, 1H, <sup>3</sup>J<sub>HH</sub> = 8.9, <sup>4</sup>J<sub>HH</sub> = 7.4, H9).

<sup>13</sup>C {<sup>1</sup>H} NMR (101 MHz, DMSO-*d*<sub>6</sub>, 298 K):  $\delta$ (ppm) 164.46 (C5), 152.76 (C6), 148.53 (C1), 144.45(C4), 143.46 (C11), 132.13 (C9), 130.52 (C10), 129.82 (C8), 127.21 (C7), 125.80 (C2), 122.66 (C3).

Anal. Calc. for C<sub>11</sub>H<sub>8</sub>AuNCl<sub>2</sub> (MW: 422.06 g·mol<sup>-1</sup>) C, 31.30; H, 1.91; Au, 46.67; N, 3.32; Cl, 16.80. Found: C, 31.4; H, 1.9; N 3.2.

## [AuCl(NHC)(ppy)]Cl (1)

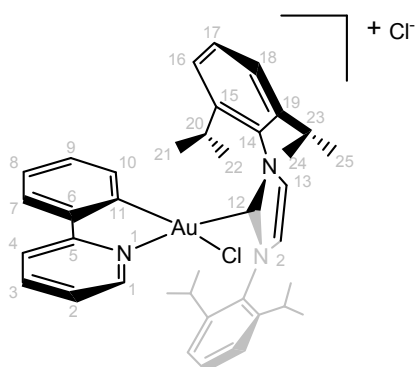

In a Schlenk flask, 1 equivalent (0.25 mmol) of NHC·HCl, 1.1 equiv. (116.1 mg, 0.275mmol) of [AuCl<sub>2</sub>(ppy)], and 4 equiv. (100.1 mg, 1 mmol) of KHCO<sub>3</sub> were dissolved in 10 mL of acetonitrile and stirred at room temperature overnight. The solvent was then removed under vacuum, the residue was dissolved in dichloromethane (10 mL), and the mixture was filtered through a paddle of Celite. The volume of the solution was reduced to about 2 mL and the complex precipitated by adding *n*-pentane. The white microcrystalline product was collected by filtration, washed with *n*-pentane (2 x 2 mL) and dried under vacuum. Yield was 94%. NMR and elemental analysis data are in accordance with those reported in the literature.

<sup>1</sup>H NMR (400 MHz, CDCl<sub>3</sub>, 298 K): δ(ppm) 9.28 (dd, 1H, <sup>3</sup>J<sub>HH</sub> = 6.1 Hz, <sup>4</sup>J<sub>HH</sub> = 1.6 Hz, H1), 8.43 (dd, 1H, <sup>3</sup>J<sub>HH</sub> = 8.2, <sup>4</sup>J<sub>HH</sub> = 1.4 Hz, H4), 8.34 (td, 1H, <sup>3</sup>J<sub>HH</sub> = 7.8 Hz, <sup>4</sup>J<sub>HH</sub> = 1.6 Hz, H3), 8.06 – 7.99 (m, 3H, H7,13), 7.57 – 7.44 (m, 4H, H2,8,17), 7.35 (dd, 2H, <sup>3</sup>J<sub>HH</sub> = 7.8 Hz, <sup>4</sup>J<sub>HH</sub> = 1.6 Hz, H18), 7.32 – 7.26 (m, 1H, H9), 7.24 (dd, 1H, <sup>3</sup>J<sub>HH</sub> = 7.8 Hz, <sup>3</sup>J<sub>HH</sub> = 1.5 Hz, H16), 6.95 (d, 1H, <sup>3</sup>J<sub>HH</sub> = 7.9 Hz, H10), 3.05 (p, 2H, <sup>3</sup>J<sub>HH</sub> = 6.7 Hz, H20), 2.89 (p, 2H, <sup>3</sup>J<sub>HH</sub> = 6.7 Hz, H23), 1.45 (d, 6H, <sup>3</sup>J<sub>HH</sub> = 6.6 Hz, H24), 1.27 (d, 6H, <sup>3</sup>J<sub>HH</sub> = 6.7 Hz, H22), 1.13 (d, 6H, <sup>3</sup>J<sub>HH</sub> = 6.8 Hz, H25), 0.72 (d, 6H, <sup>3</sup>J<sub>HH</sub> = 6.7 Hz, H21).

<sup>13</sup>C {<sup>1</sup>H} NMR (101 MHz, CDCl<sub>3</sub>, 298 K): δ(ppm) 163.80 (1C, C5), 149.20 (1C, C12), 147.26 (1C, C1), 147.20 (1C, C19), 144.93 (2C, C15), 144.43 (1C, C3), 143.40 (1C, C11), 132.62 (1C, C9), 132.58 (1C, C6), 132.50 (2C, C14), 132.21 (1C, C10), 131.98 (2C, C17), 130.02 (1C, C8), 128.67 (2C, C13), 127.59 (1C, C7), 125.16(2C, C16), 124.90 (2C, C18), 124.53 (1C, C2), 122.55 (1C, C4), 29.51 (2C, C23), 29.11 (2C, C20), 26.94 (2C, C25), 26.75 (2C, C22), 22.82 (2C, C21), 22.66 (2C, C24).

<sup>15</sup>N (41 MHz, acetone-d<sub>6</sub>, 298 K): δ(ppm) -147.7 (1N, N1), -189.8 (2N, N2)

Anal. Calc. for C<sub>38</sub>H<sub>44</sub>AuN<sub>3</sub>Cl<sub>2</sub> (MW: 810.66 g·mol<sup>-1</sup>) C, 56.30; H, 5.47; Au, 24.30; N, 5.18, Cl, 8.75.

Found: C, 56.1; H, 5.4; N 5.1.

### [AuCl(PPh<sub>3</sub>)(ppy)]OTf (2)

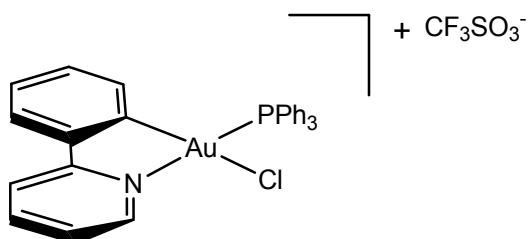

An acetone solution (9 mL) of [AuCl<sub>2</sub>(ppy)] (105.5 mg, 0.25 mmol), triphenylphosphine (72.1 mg, 1.1 eq.), and NaCF<sub>3</sub>SO<sub>3</sub> (176 mg, 4 eq.) was stirred overnight in a Schlenk flask. The acetone was then removed under vacuum, dichloromethane (10 mL) was added and the solid was eliminated by filtration through celite. The volume of the solution was reduced to about 2 mL and a white solid precipitated by adding *n*-pentane. (yield 91%).

<sup>1</sup>H NMR (400 MHz, CDCl<sub>3</sub>, 298 K): δ(ppm) 9.60 (br, 1H), 8.23 (br, 2H), 7.70 (m, 17H), 7.38 (br, 1H), 6.84 (m, 1H), 6.78 (m, 1H)

<sup>31</sup>P {<sup>1</sup>H} NMR (162 MHz, CD<sub>2</sub>Cl<sub>2</sub>, 298 K): δ(ppm) 43.46 (s).

<sup>19</sup>F NMR (376 MHz, CD<sub>2</sub>Cl<sub>2</sub>, 298 K): δ(ppm) -78.88 (s).

Anal. Calc. for C<sub>30</sub>H<sub>23</sub>AuNO<sub>3</sub>F<sub>3</sub>PSCI (MW: 797.97 g·mol<sup>-1</sup>) C, 45.16; H, 2.91; Au, 24.68; N, 1.76 O, 6.02; F, 7.14; P, 3.88; S, 4.02; Cl, 4.44. Found: C, 45.1; H, 2.9; N 1.8.

### [Au(H<sub>2</sub>O)(NHC)(ppy)](BF<sub>4</sub>)<sub>2</sub> (3)

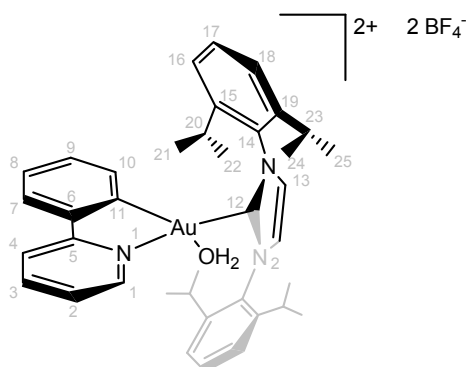

The complex [Au(H<sub>2</sub>O)(NHC)(ppy)](BF<sub>4</sub>)<sub>2</sub> was synthesized in an NMR tube adding an excess of silver tetrafluoroborate to the [AuCl(NHC)(ppy)]Cl complex in deuterated dichloromethane. To the solution was added 10 equivalents of water and the tube was shaken. The complex was characterized by mono and bidimensional <sup>1</sup>H, <sup>13</sup>C and <sup>19</sup>F NMR experiments. The assignment of all <sup>1</sup>H, <sup>13</sup>C was made with the help of bidimensional experiments such as <sup>1</sup>H-<sup>1</sup>H COSY, <sup>1</sup>H-<sup>13</sup>C HSQC, <sup>1</sup>H-<sup>13</sup>C HMBC and <sup>1</sup>H-<sup>1</sup>H NOESY spectra.

<sup>1</sup>H NMR(400 MHz, CD<sub>2</sub>Cl<sub>2</sub>, 298 K): δ(ppm) = 8.75 (dt, 1H, <sup>3</sup>J<sub>HH</sub> = 5.9, <sup>4</sup>J<sub>HH</sub> = 2.0 Hz, H1), 8.18 (td, 1H, <sup>3</sup>J<sub>HH</sub> = 7.9, <sup>4</sup>J<sub>HH</sub> = 1.6 Hz, H3), 7.93 (dt, 1H, <sup>3</sup>J<sub>HH</sub> = 8.2, <sup>4</sup>J<sub>HH</sub> = 1.1 Hz, H4), 7.71 (s, 2H, H13), 7.66 (dt, 1H, <sup>3</sup>J<sub>HH</sub> = 7.8, <sup>4</sup>J<sub>HH</sub> = 1.8 Hz, H7), 7.61 – 7.52 (m, 3H, H2-17), 7.48 - 7.41 (m, 3H, H8-18), 7.32 (dd, 2H, <sup>3</sup>J<sub>HH</sub> = 7.8, <sup>4</sup>J<sub>HH</sub> = 1.5 Hz, H16), 7.25 (tt, 1H, <sup>3</sup>J<sub>HH</sub> = 7.7, <sup>4</sup>J<sub>HH</sub> = 1.8 Hz, H9), 6.98 (ddd, 1H,

$^3J_{HH} = 7.9$ ,  $^4J_{HH} = 3.5$  Hz, H10), 2.94 (m, 4H, H20-23), 1.46 (d, 6H,  $^3J_{HH} = 6.6$  Hz, H24), 1.33 (d, 6H,  $^3J_{HH} = 6.7$  Hz, H22), 1.13 (d, 6H,  $^3J_{HH} = 6.8$  Hz, H25), 0.94 (d, 6H,  $^3J_{HH} = 6.8$  Hz, H21)

$^{13}\text{C}$  { $^1\text{H}$ } NMR (101 MHz,  $\text{CD}_2\text{Cl}_2$ , 298 K)  $\delta(\text{ppm}) = 162.20$  (1C, C5), 150.56 (1C, C12), 147.36 (1C, C19), 145.61 (d, 1C, C1), 144.91 (1C, C15), 144.16 (1C, C3), 143.05 (1C, C11), 134.70 (1C, C6), 133.32 (d, 1C, C10), 132.73 (1C, C9), 132.12 (2C, C14), 131.83(2C, C17), 129.52 (1C, C8), 127.14 (2C, C13), 126.47 (1C, C7), 124.99-124.96 (4C, C16-18), 124.42 (1C, C2), 120.97 (1C, C4), 29.22-29.17 (4C, C20-23), 26.31 (2C, C22), 26.18 (2C, C25), 22.68 (2C, C21), 22.16-22.10 (d, 2C, C24).

$^{19}\text{F}$  NMR (376 MHz,  $\text{CD}_2\text{Cl}_2$ , 298 K):  $\delta(\text{ppm}) = -152.74$  (d,  $J=20.8$  Hz).



### 3.1.2 Anion effect

Table 2

| In situ: [AuCl(NHC)(ppy)]Cl + 2 AgX |                  |                        |                  |                        |                               |                        |                  |                        |                              |                        |                  |                        |
|-------------------------------------|------------------|------------------------|------------------|------------------------|-------------------------------|------------------------|------------------|------------------------|------------------------------|------------------------|------------------|------------------------|
| Entry                               | 5                |                        | 6                |                        | 7                             |                        | 8                |                        | 9                            |                        | 10               |                        |
| X <sup>-</sup>                      | OTf <sup>-</sup> |                        | TFA <sup>-</sup> |                        | SbF <sub>6</sub> <sup>-</sup> |                        | OTs <sup>-</sup> |                        | BF <sub>4</sub> <sup>-</sup> |                        | OAc <sup>-</sup> |                        |
| t (h)                               | Conv (%)         | TOF (h <sup>-1</sup> ) | Conv (%)         | TOF (h <sup>-1</sup> ) | Conv (%)                      | TOF (h <sup>-1</sup> ) | Conv (%)         | TOF (h <sup>-1</sup> ) | Conv (%)                     | TOF (h <sup>-1</sup> ) | Conv (%)         | TOF (h <sup>-1</sup> ) |
| 0.5                                 | 3                | 7                      | 11               | 22                     | 2                             | 3                      | 2                | 3                      | 6                            | 13                     | 1                | 2                      |
| 1                                   | 7                | 7                      | 1                | 1                      | 6                             | 6                      | 5                | 5                      | 5                            | 5                      | 1                | 1                      |
| 2                                   | 15               | 8                      | 0                | 0                      | 19                            | 9                      | 10               | 5                      | 14                           | 7                      | 1                | 1                      |
| 4                                   | 49               | 12                     | 4                | 1                      | 60                            | 15                     | 20               | 5                      | 44                           | 11                     | 2                | 0                      |
| 6                                   | 72               | 12                     | 6                | 1                      | 84                            | 14                     | 31               | 5                      | 60                           | 15                     | 2                | 0                      |
| 8                                   | 95               | 12                     | 9                | 1                      | 94                            | 12                     | 42               | 5                      | 94                           | 12                     | 3                | 0                      |
| 24                                  | 94               | 4                      | 27               | 1                      | 95                            | 4                      | 92               | 3                      | 94                           | 3                      | 5                | 0                      |

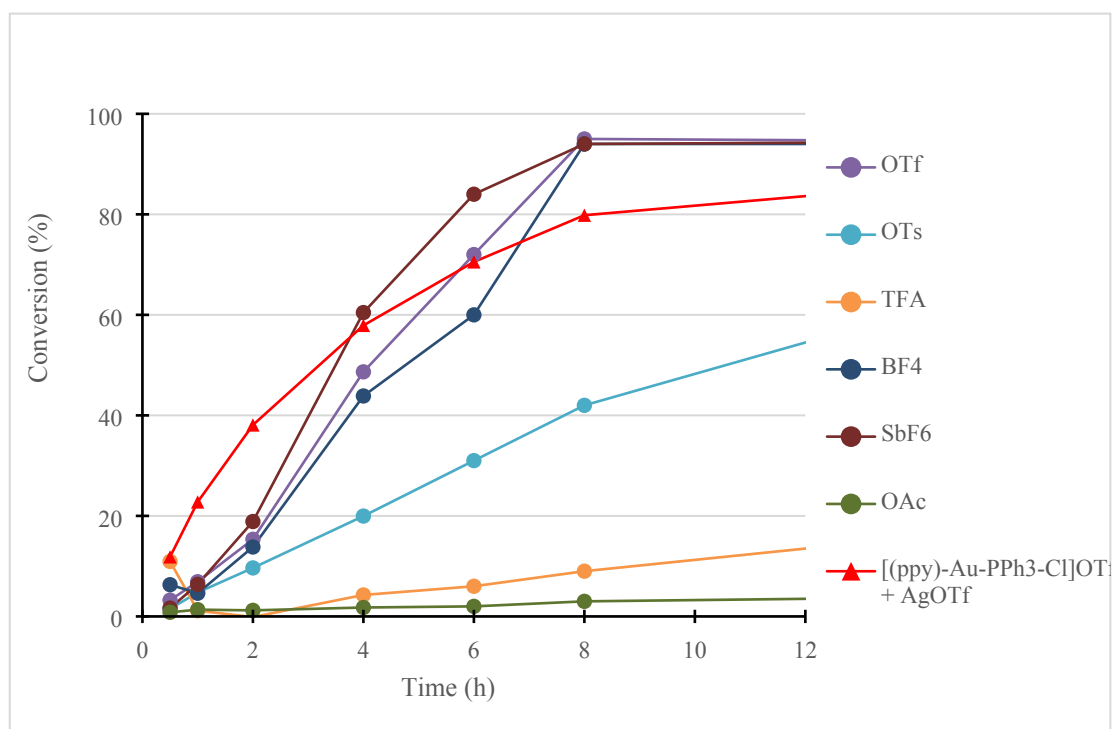

### 3.2 Role of additive and KIE (Kinetic Isotopic Effect)

| t (h) | Reference |                        | HOTf 5%  |                        | AgOTf 3eq |                        | KIE study |                        |                                   |
|-------|-----------|------------------------|----------|------------------------|-----------|------------------------|-----------|------------------------|-----------------------------------|
|       | Conv (%)  | TOF (h <sup>-1</sup> ) | Conv (%) | TOF (h <sup>-1</sup> ) | Conv (%)  | TOF (h <sup>-1</sup> ) | Conv (%)  | TOF (h <sup>-1</sup> ) | H <sub>2</sub> O/D <sub>2</sub> O |
| 0.5   | 6         | 11                     | 9        | 19                     | 11        | 21                     | 4         | 9                      | 1,27                              |
| 1     | 14        | 14                     | 18       | 19                     | 20        | 20                     | 10        | 10                     | 1,36                              |
| 2     | 31        | 15                     | 33       | 17                     | 32        | 17                     | 17        | 9                      | 1,78                              |
| 4     | 66        | 17                     | 58       | 15                     | 65        | 16                     | 46        | 12                     | 1,44                              |
| 6     | 90        | 15                     | 74       | 13                     | 88        | 15                     | 70        | 12                     | 1,29                              |
| 8     | 89        | 11                     | 85       | 11                     | 96        | 12                     | 88        | 11                     | 1,01                              |
| 24    | 90        | 4                      | 95       | 4                      | 96        | 4                      | 91        | 4                      | 0,99                              |

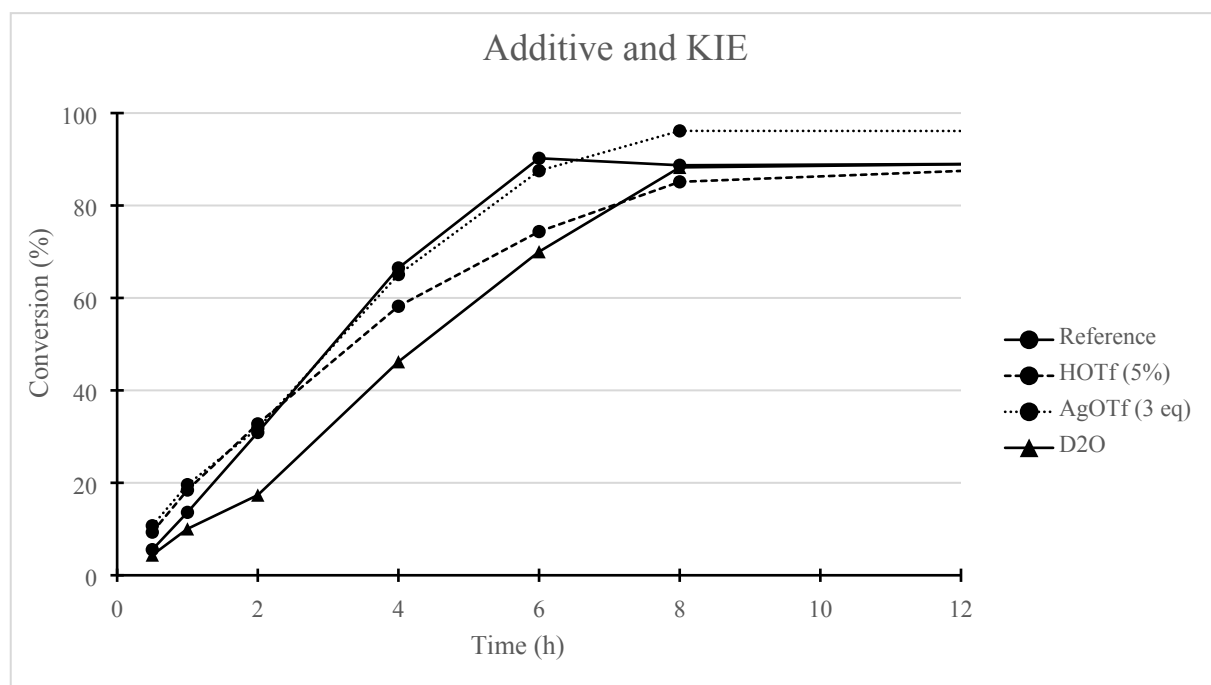



### 3.3 Temperature effect

| T     | 40 °C    |                        | 50 °C    |                        | 65 °C    |                        | 80 °C    |                        | 120 °C   |                        |
|-------|----------|------------------------|----------|------------------------|----------|------------------------|----------|------------------------|----------|------------------------|
| t (h) | Conv (%) | TOF (h <sup>-1</sup> ) |
| 0.17  | -        | -                      | -        | -                      | -        | -                      | -        | -                      | 46       | 289                    |
| 0.5   | 4        | 8                      | 6        | 11                     | 16       | 32                     | 32       | 64                     | 83       | 172                    |
| 1     | 7        | 7                      | 14       | 14                     | 32       | 32                     | 60       | 60                     | 88       | 92                     |
| 2     | 14       | 7                      | 31       | 15                     | 65       | 33                     | 89       | 45                     | -        | -                      |
| 4     | 28       | 7                      | 66       | 17                     | 90       | 22                     | 93       | 23                     | -        | -                      |
| 6     | 44       | 7                      | 90       | 15                     | 90       | 15                     | -        | -                      | -        | -                      |
| 8     | 62       | 8                      | 89       | 11                     | -        | -                      | -        | -                      | -        | -                      |
| 24    | 93       | 4                      | 90       | 4                      | -        | -                      | 95       | 4                      | -        | -                      |

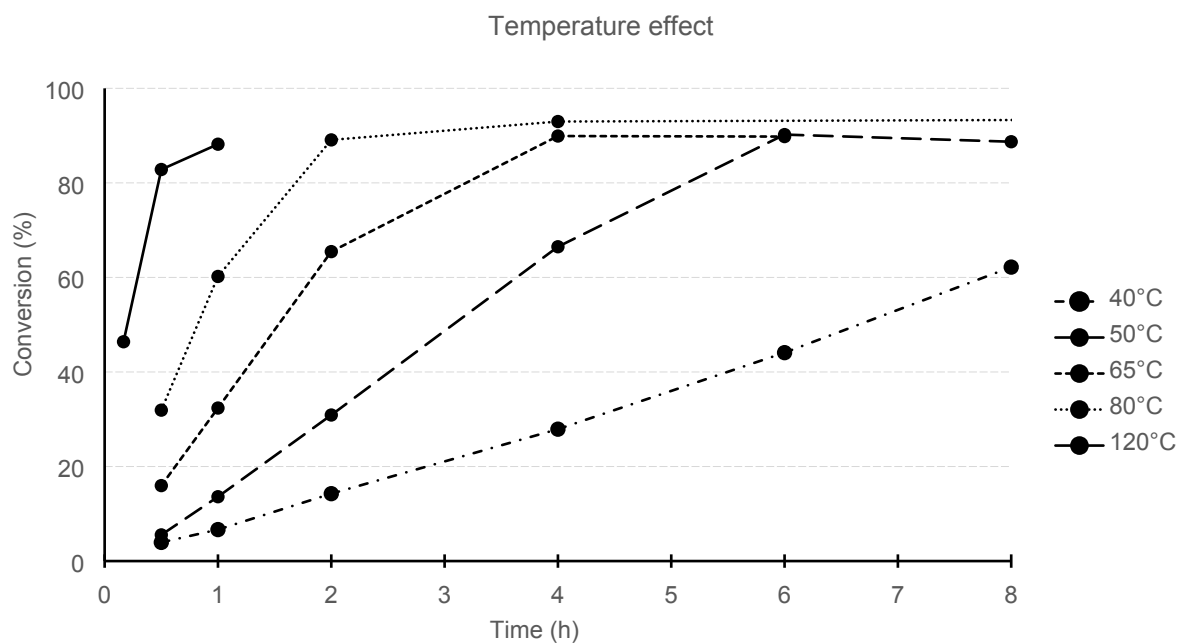

### 3.3.1 Arrhenius equation

TOF calculated at 50% of conversion

| 1/T (K <sup>-1</sup> ) | ln(TOF) |
|------------------------|---------|
| 0.0032                 | 1.933   |
| 0.0031                 | 2.625   |
| 0.0030                 | 3.476   |
| 0.0028                 | 4.127   |
| 0.0025                 | 5.624   |

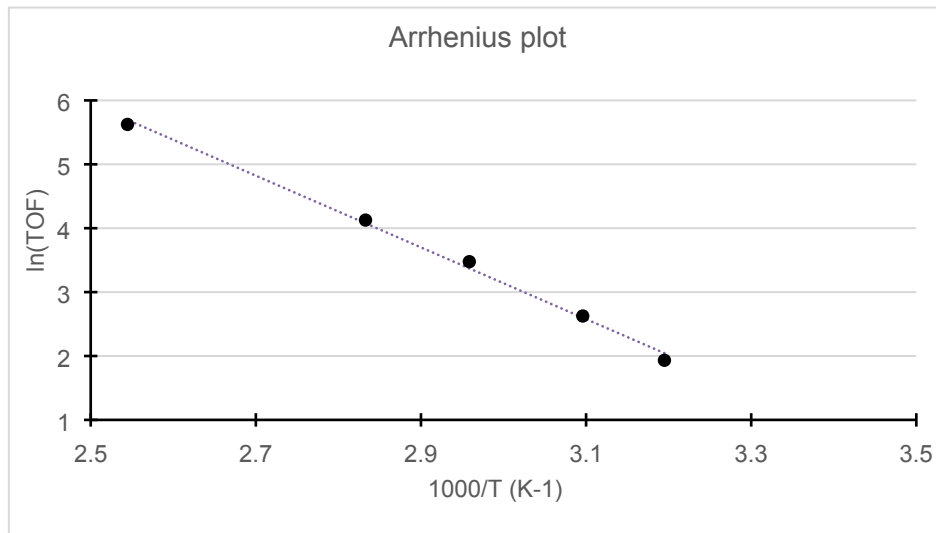

$$k = Ae^{-\frac{E_a}{RT}} \rightarrow \ln(k) = \ln(A) - \frac{E_a}{R} \cdot \frac{1}{T}$$

$$\frac{E_a}{R} = 5.612 \cdot 10^3 \rightarrow E_a = 46\,660\text{ J} = 11\,150\text{ cal}$$

### 3.4 Concentration

#### 3.4.1 Catalyst concentration

|       | 0.1%     |                        | 0.2%     |                        | 0.5%     |                        | 1.0%     |                        | 1.5%     |                        | 2.0%     |                        |
|-------|----------|------------------------|----------|------------------------|----------|------------------------|----------|------------------------|----------|------------------------|----------|------------------------|
| t (h) | Conv (%) | TOF (h <sup>-1</sup> ) |
| 0.5   | 3        | 58                     | 2        | 16                     | 3        | 13                     | 5        | 10                     | 9        | 12                     | 9        | 9                      |
| 1     | 0        | 2                      | 3        | 17                     | 6        | 12                     | 13       | 13                     | 17       | 11                     | 22       | 11                     |
| 2     | -        | -                      | 3        | 8                      | 13       | 13                     | 28       | 14                     | 30       | 10                     | 44       | 11                     |
| 4     | 1        | 3                      | 10       | 13                     | 24       | 12                     | 60       | 15                     | 70       | 11                     | 85       | 11                     |
| 6     | 0        | 1                      | 12       | 10                     | 35       | 12                     | 87       | 15                     | 88       | 10                     | 89       | 7                      |
| 8     | -2       | -2                     | 21       | 13                     | 58       | 15                     | 92       | 12                     | 87       | 7                      | 90       | 6                      |
| 24    | 25       | 10                     | 75       | 16                     | 91       | 8                      | 92       | 4                      | 87       | 2                      | 90       | 2                      |

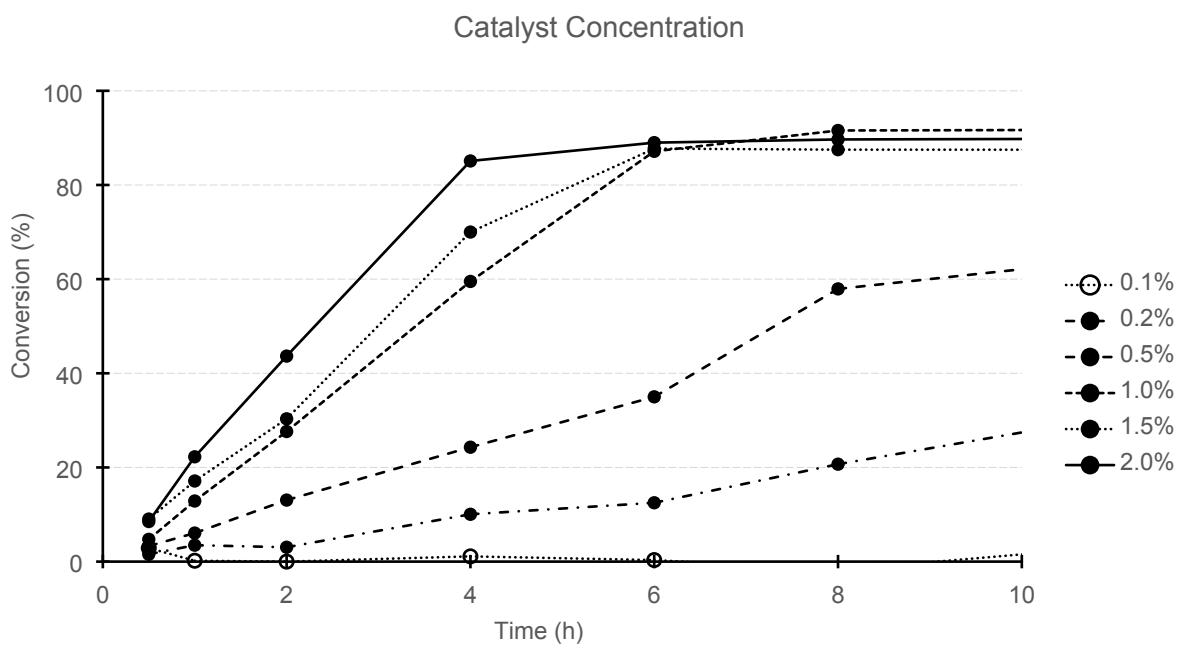

| Catalyst conc. (%) | Conversion after 1h |
|--------------------|---------------------|
| 0.1                | -                   |
| 0.2                | 3                   |
| 0.5                | 6                   |
| 1                  | 13                  |
| 1.5                | 17                  |
| 2                  | 22                  |

Concentration vs Conversion

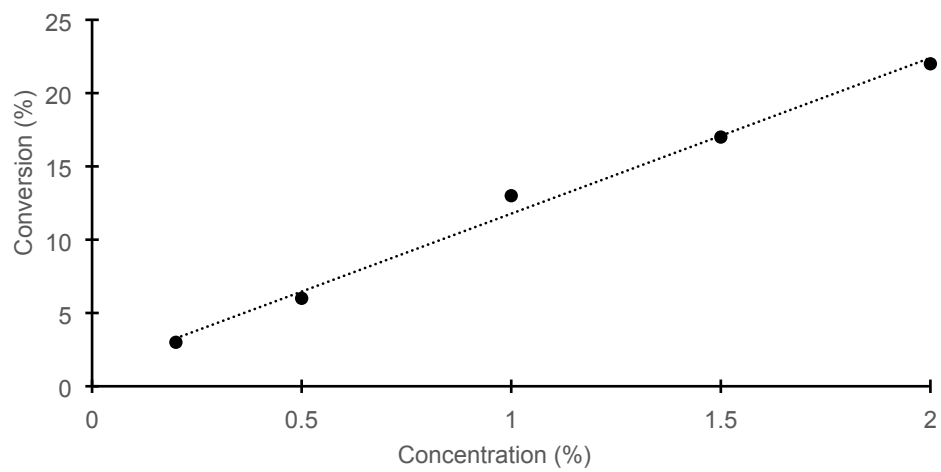

### 3.4.2 Substrates concentration

| Volume | 3-hexyne   |                        |             |                        |             |                        | H <sub>2</sub> O |                        |            |                        |            |                        |
|--------|------------|------------------------|-------------|------------------------|-------------|------------------------|------------------|------------------------|------------|------------------------|------------|------------------------|
|        | 50 $\mu$ L |                        | 100 $\mu$ L |                        | 200 $\mu$ L |                        | 18 $\mu$ L       |                        | 36 $\mu$ L |                        | 54 $\mu$ L |                        |
| t (h)  | Conv (%)   | TOF (h <sup>-1</sup> ) | Conv (%)    | TOF (h <sup>-1</sup> ) | Conv (%)    | TOF (h <sup>-1</sup> ) | Conv (%)         | TOF (h <sup>-1</sup> ) | Conv (%)   | TOF (h <sup>-1</sup> ) | Conv (%)   | TOF (h <sup>-1</sup> ) |
| 0.5    | 13         | 13                     | 6           | 11                     | 4           | 16                     | 6                | 11                     | 1          | 1                      | 1          | 3                      |
| 1      | 28         | 14                     | 14          | 14                     | 10          | 21                     | 14               | 14                     | 9          | 9                      | 10         | 10                     |
| 2      | 59         | 15                     | 31          | 15                     | 24          | 24                     | 31               | 15                     | 25         | 12                     | 25         | 12                     |
| 4      | 90         | 11                     | 66          | 17                     | 36          | 18                     | 66               | 17                     | 60         | 15                     | 62         | 15                     |
| 6      | 91         | 8                      | 90          | 15                     | 42          | 14                     | 90               | 15                     | 86         | 14                     | 87         | 14                     |
| 8      | 92         | 6                      | 89          | 11                     | 44          | 11                     | 89               | 11                     | 88         | 11                     | 89         | 11                     |
| 24     | 90         | 2                      | 90          | 4                      | 49          | 4                      | 90               | 4                      | 88         | 4                      | 88         | 4                      |

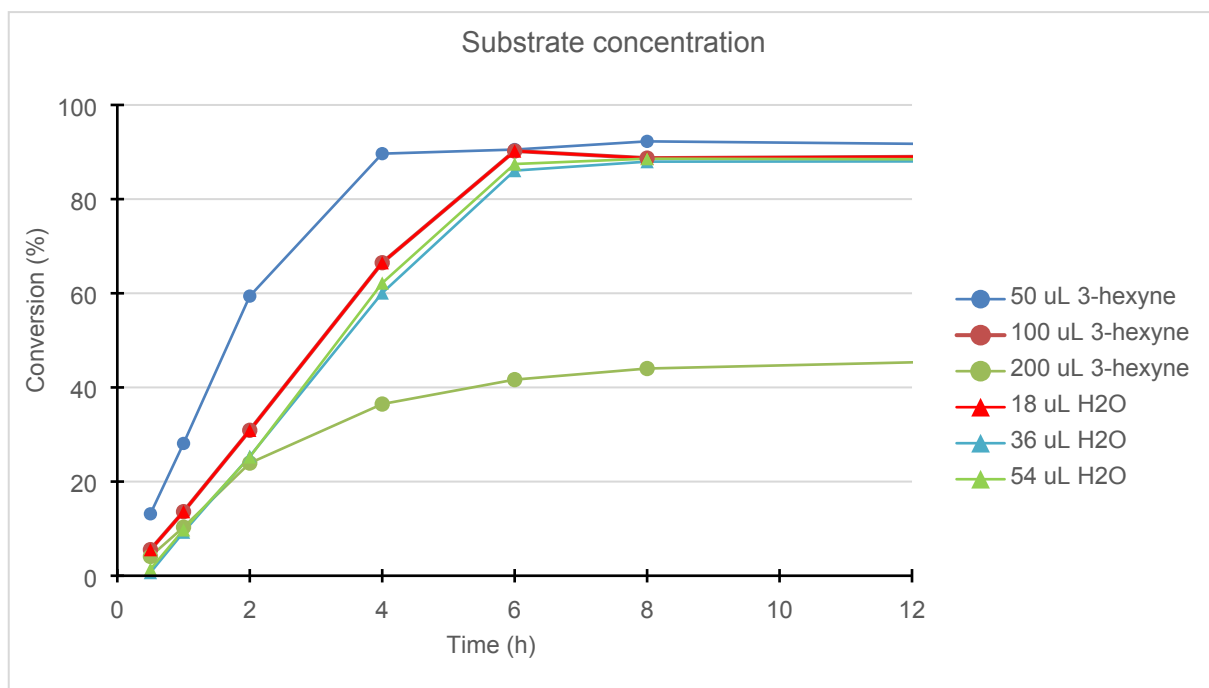

## 4. STABILITY STUDIES

In an NMR tube, the stability of  $[\text{AuCl}(\text{PPh}_3)(\text{ppy})]\text{OTf}$  and  $[\text{AuCl}(\text{NHC})(\text{ppy})]\text{Cl}$  has been studied in a catalysis-like system, using acetone- $d_6$  as the solvent instead of GVL.

### 4.1 $[\text{AuCl}(\text{NHC})(\text{ppy})]\text{Cl}$ (1)

The  $^1\text{H}$ ,  $^{13}\text{C}$  DEPT and  $^1\text{H}$ - $^{15}\text{N}$  HMBC spectra were recorded in this order:

$^1\text{H}$  NMR in acetone- $d_6$

1.  $[\text{AuCl}(\text{NHC})(\text{ppy})]\text{Cl}$  (20 mg, 0.025 mmol) in 450  $\mu\text{L}$  of acetone- $d_6$ ;
2. Solution A: +  $\text{AgBF}_4$  (1.5 eq.) +  $\text{H}_2\text{O}$  (4  $\mu\text{L}$ , 0.247 mmol);
3. Solution B: + 3-hexyne (28  $\mu\text{L}$ , 0.25 mmol) at 30% conversion

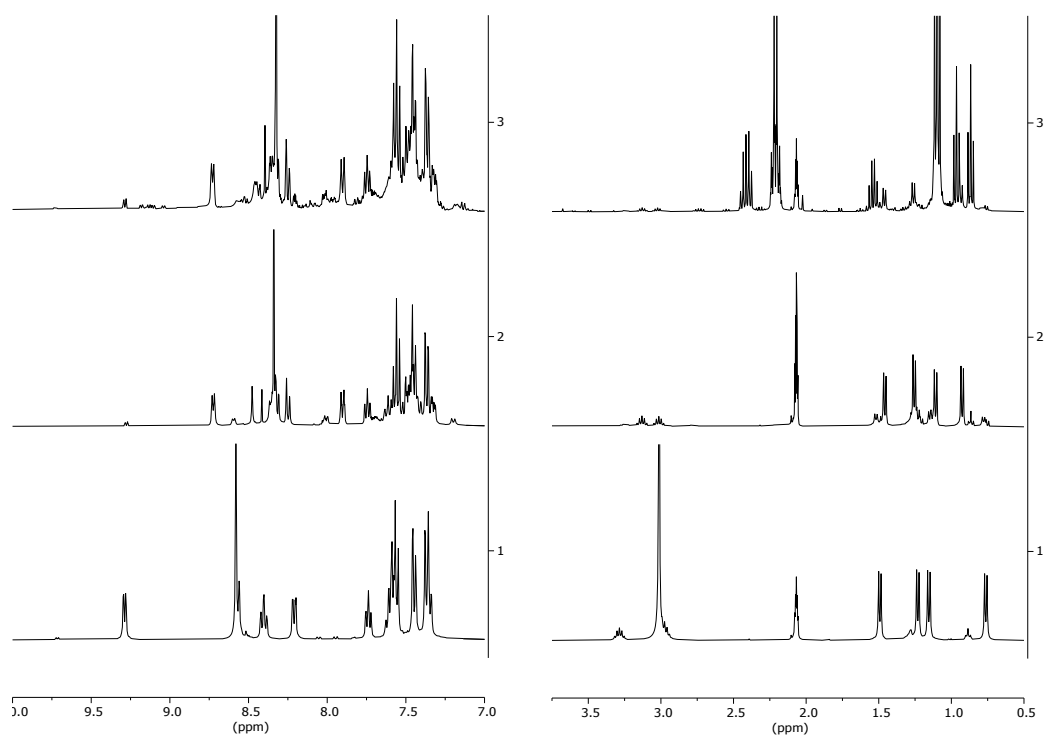

$^{13}\text{C}$  NMR in acetone- $\text{d}_6$

1. Solution A
2. Solution B

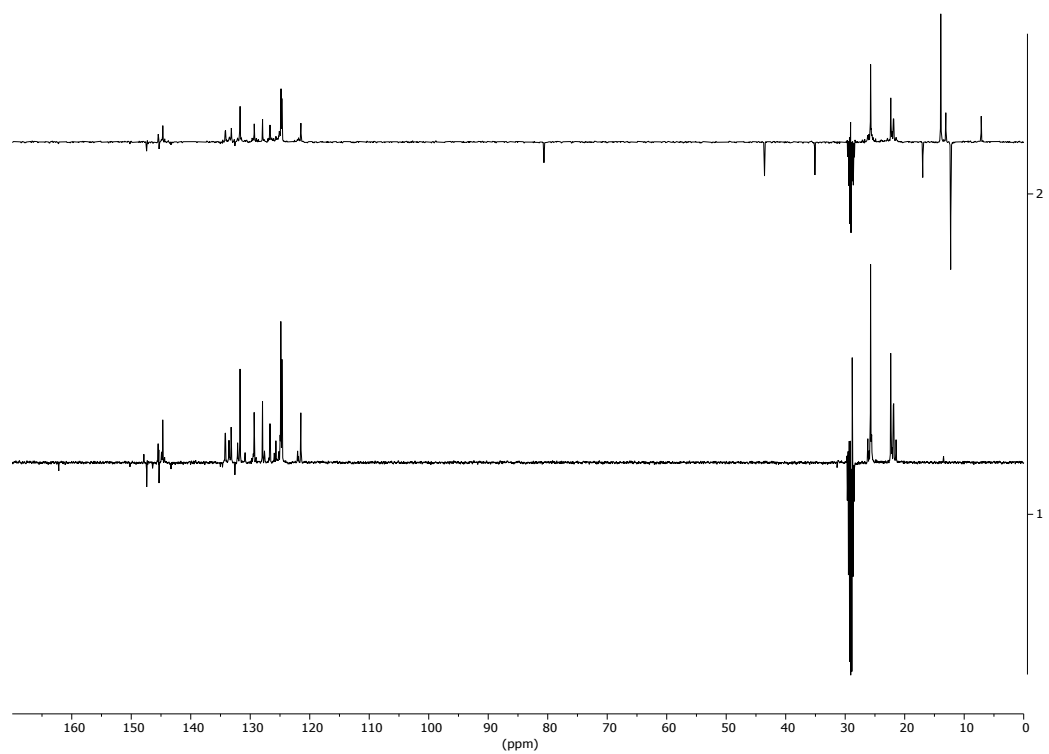

$^1\text{H}$ - $^{15}\text{N}$  HMBC in acetone- $\text{d}_6$

Solution A:

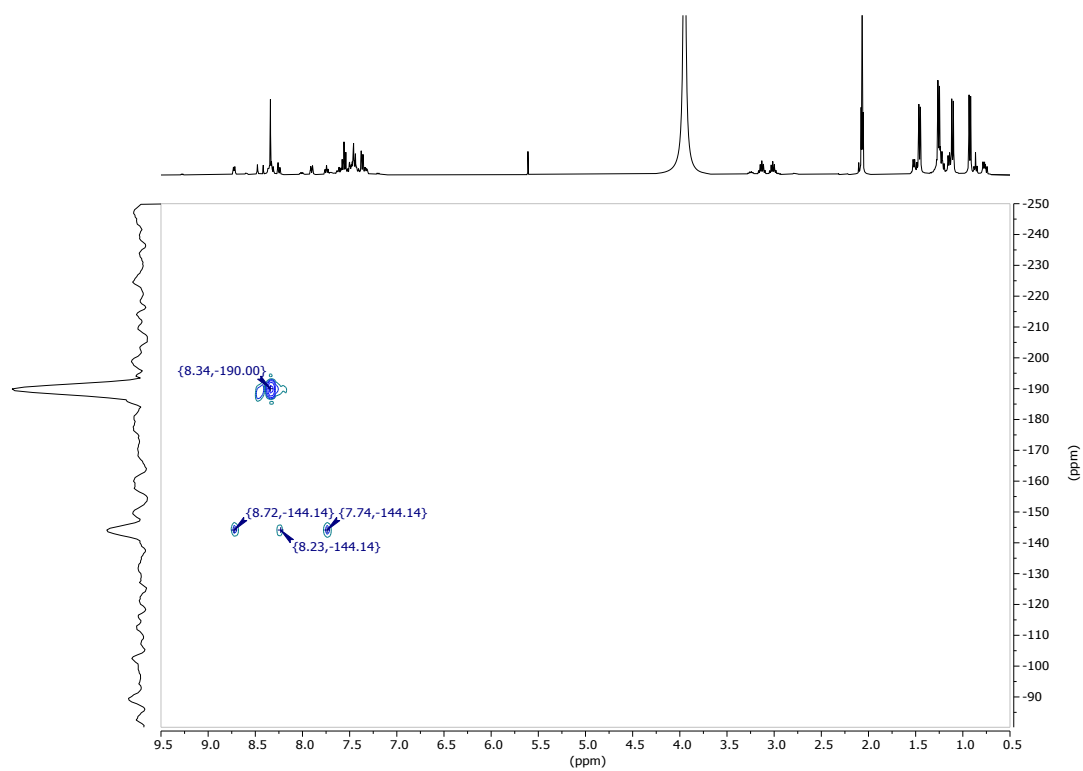

Solution B:



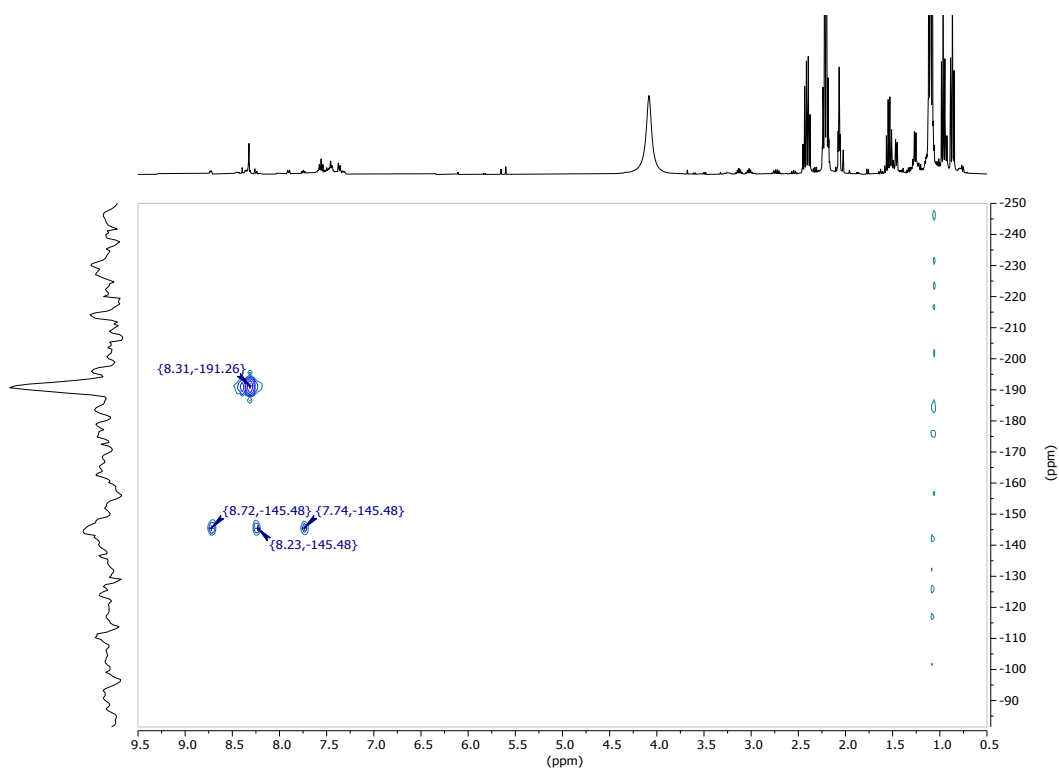

## 4.2 [AuCl(PPh<sub>3</sub>)(ppy)]OTf (2)

The <sup>1</sup>H and <sup>31</sup>P spectra were recorded in this order:

1. [AuCl(PPh<sub>3</sub>)(ppy)]OTf (7 mg, 0.088 mmol) in 400 μL of acetone-*d*<sub>6</sub>;
2. + 3-hexyne (100 μL, 0.88 mmol) + H<sub>2</sub>O (18 μL, 1 mmol);
3. + 1.5 equivalent of AgOTf at 30 °C;
6. After 6h at 30 °C;
9. After 12h at 30 °C;

<sup>1</sup>H NMR in acetone-*d*<sub>6</sub>

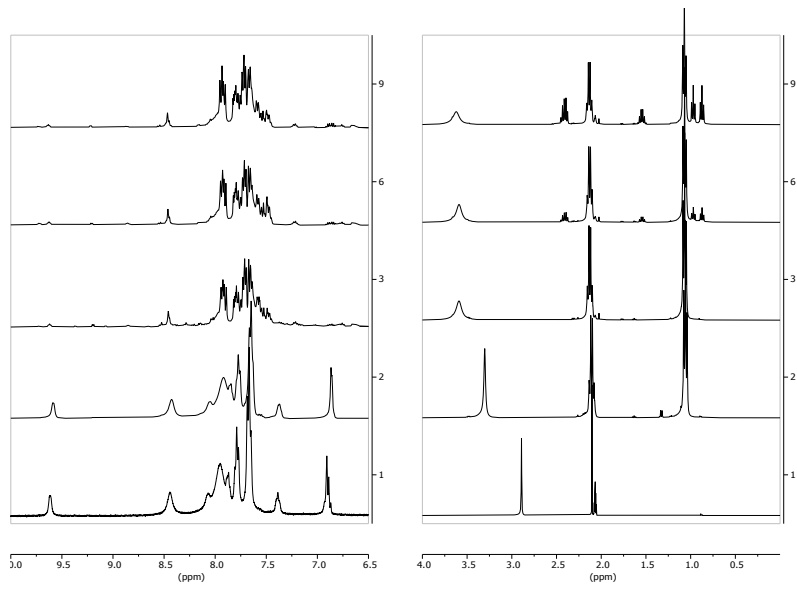

<sup>31</sup>P NMR in acetone-d<sub>6</sub>

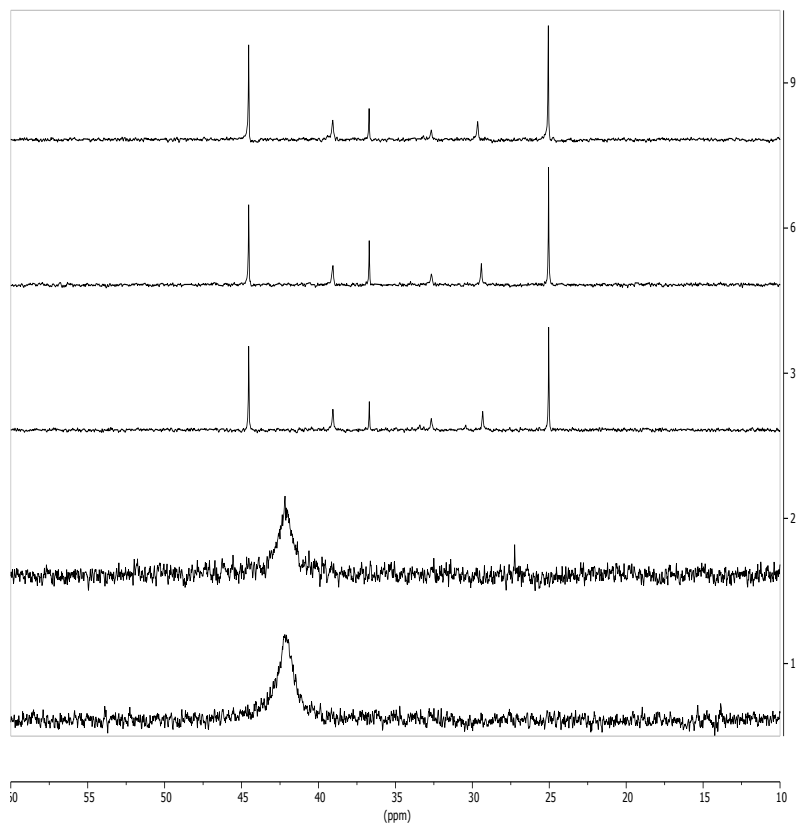

## 5. NMR SPECTRA

## 5.1 [AuCl<sub>2</sub>(ppy)]

<sup>1</sup>H NMR in DMSO-d<sub>6</sub>

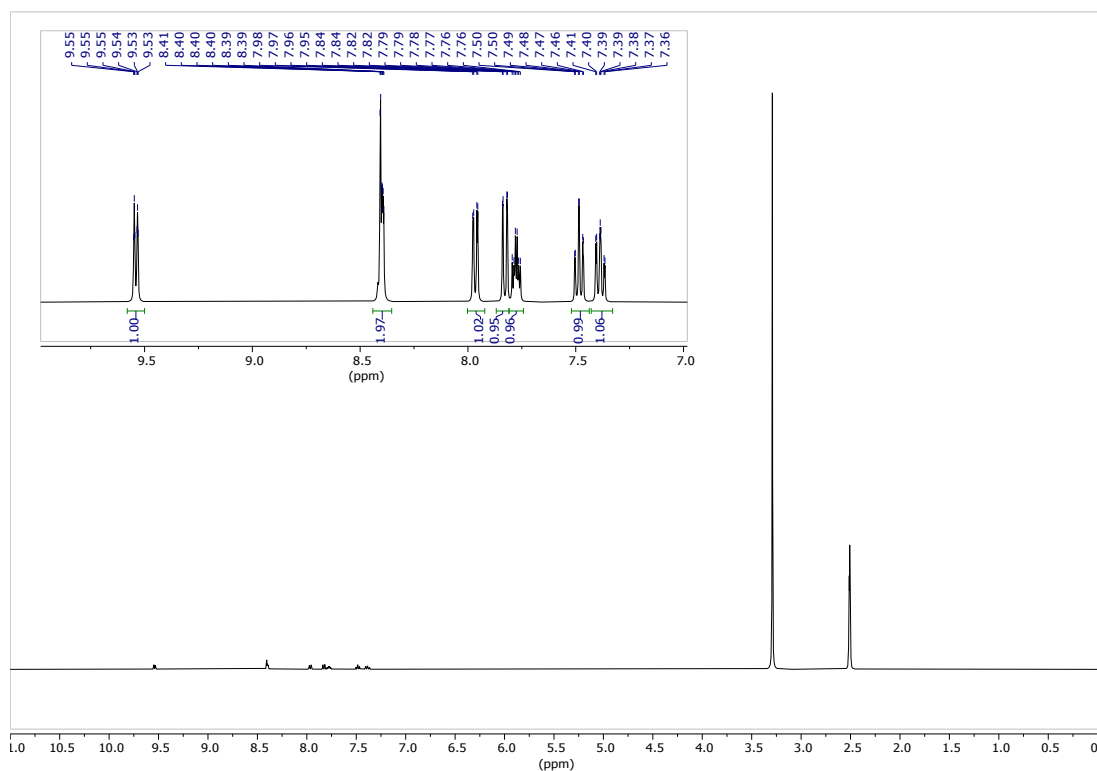

<sup>13</sup>C {<sup>1</sup>H} NMR in DMSO-d<sub>6</sub>

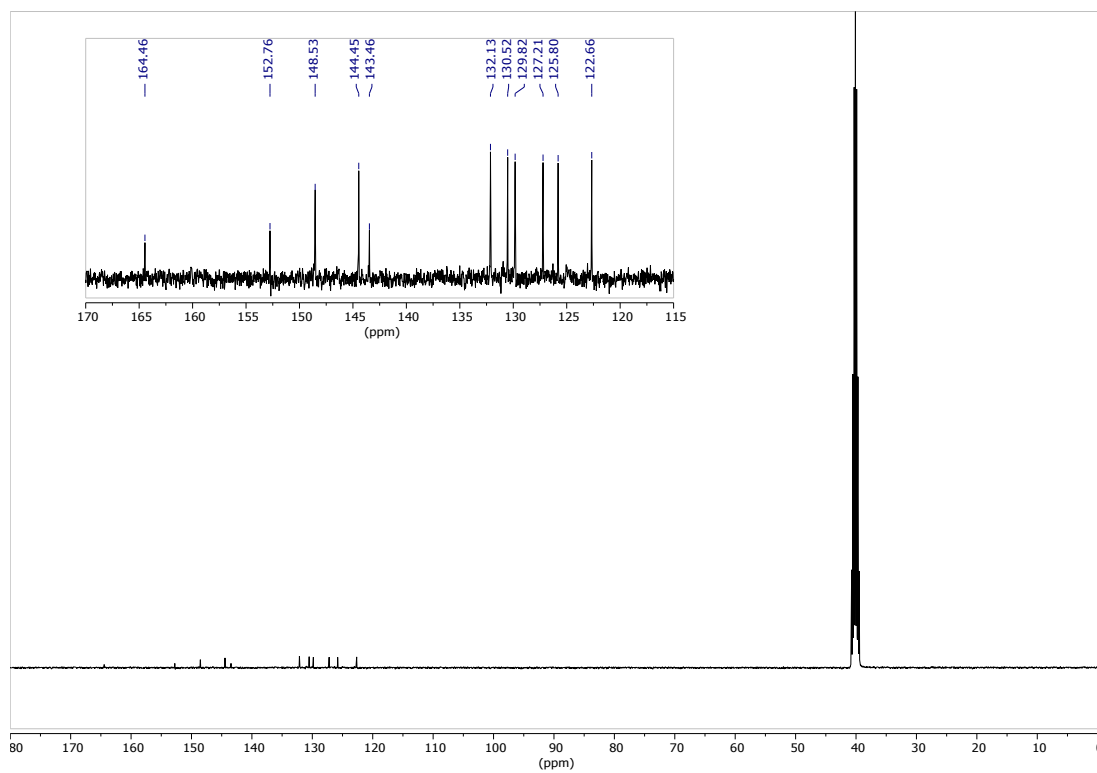

<sup>1</sup>H-<sup>1</sup>H COSY in DMSO-d<sub>6</sub>

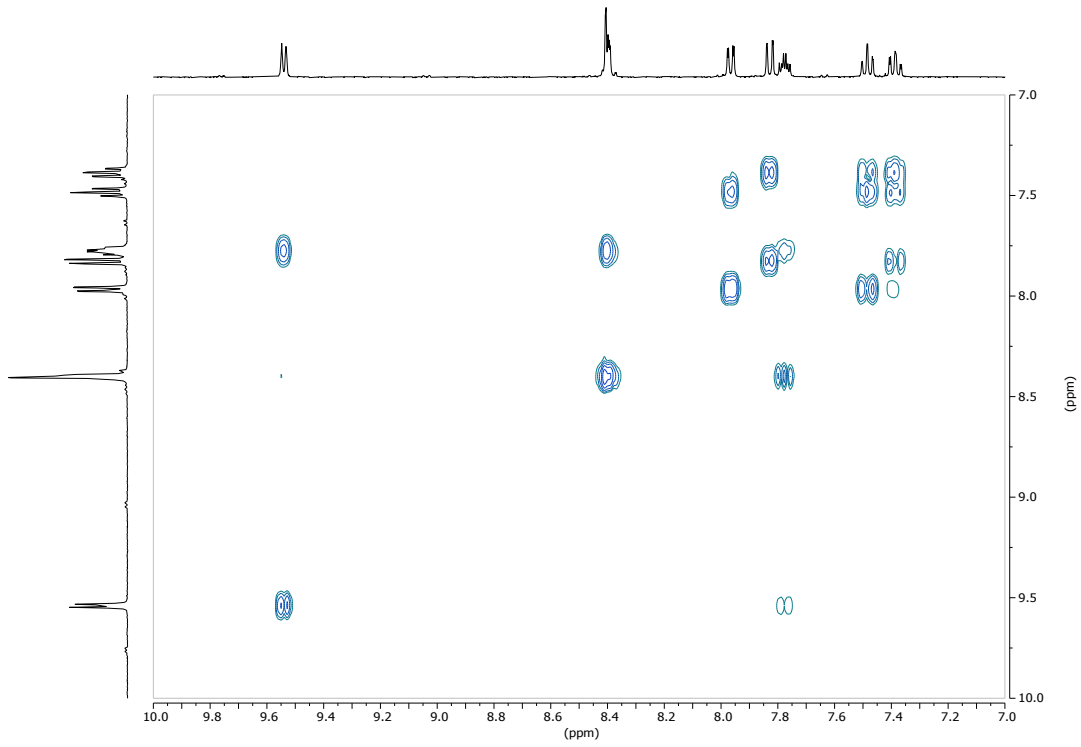

$^1\text{H}$ - $^{13}\text{C}$  HSQC in DMSO- $\text{d}_6$

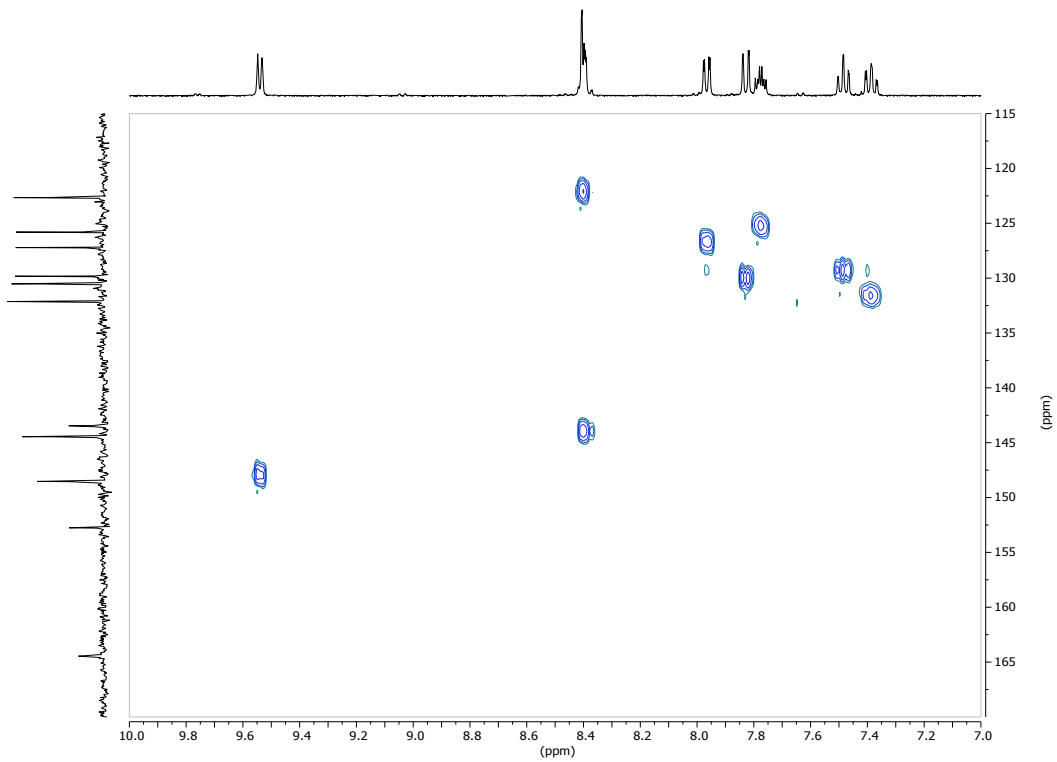

$^1\text{H}$ - $^{13}\text{C}$  HMBC in DMSO- $\text{d}_6$

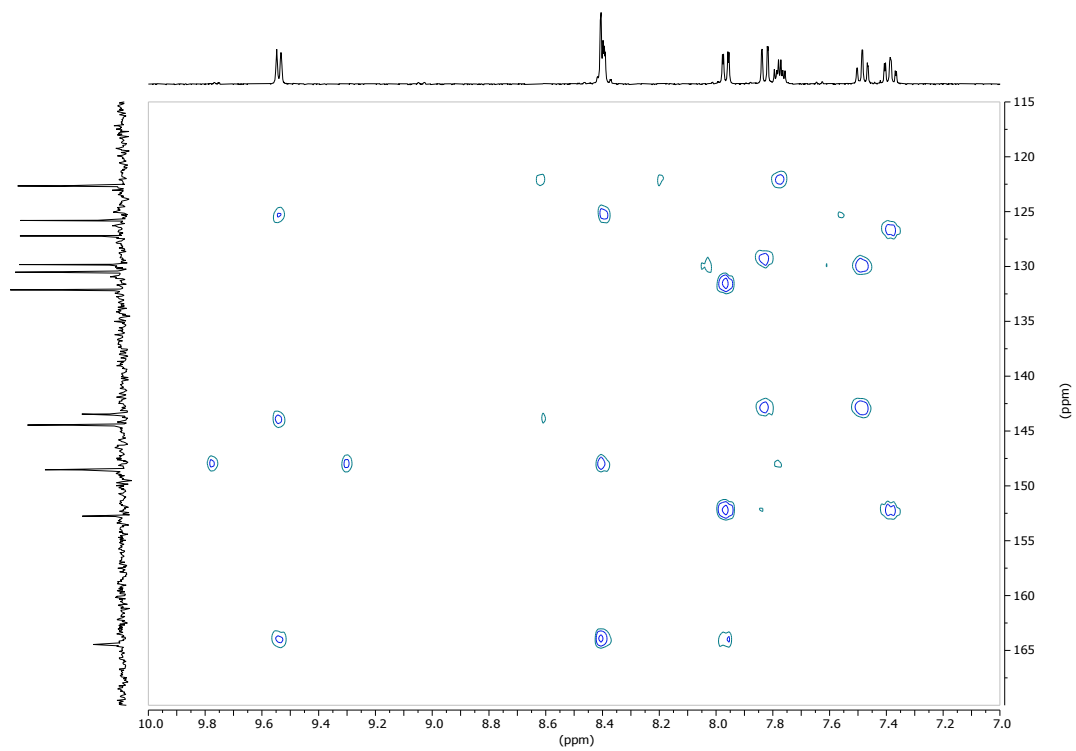

## 5.2 $[\text{AuCl}(\text{NHC})(\text{ppy})]\text{Cl}$ (1)

### $^1\text{H}$ NMR in $\text{CDCl}_3$

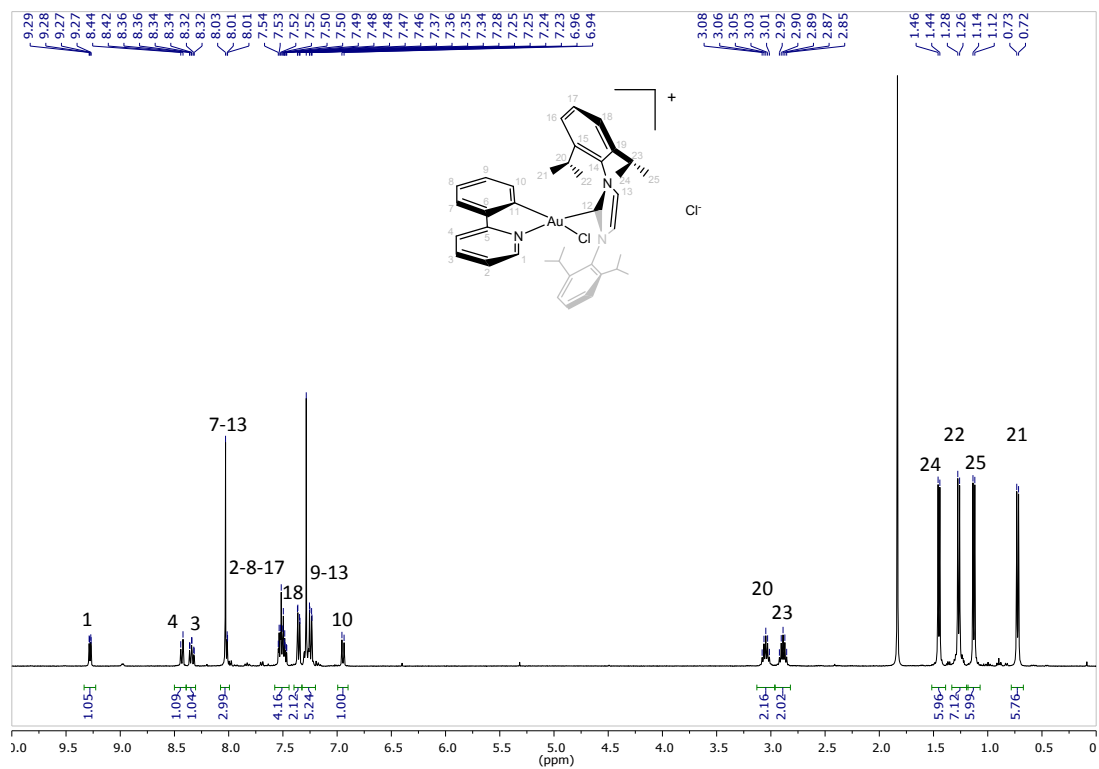

### $^{13}\text{C}$ $\{^1\text{H}\}$ NMR in $\text{CDCl}_3$

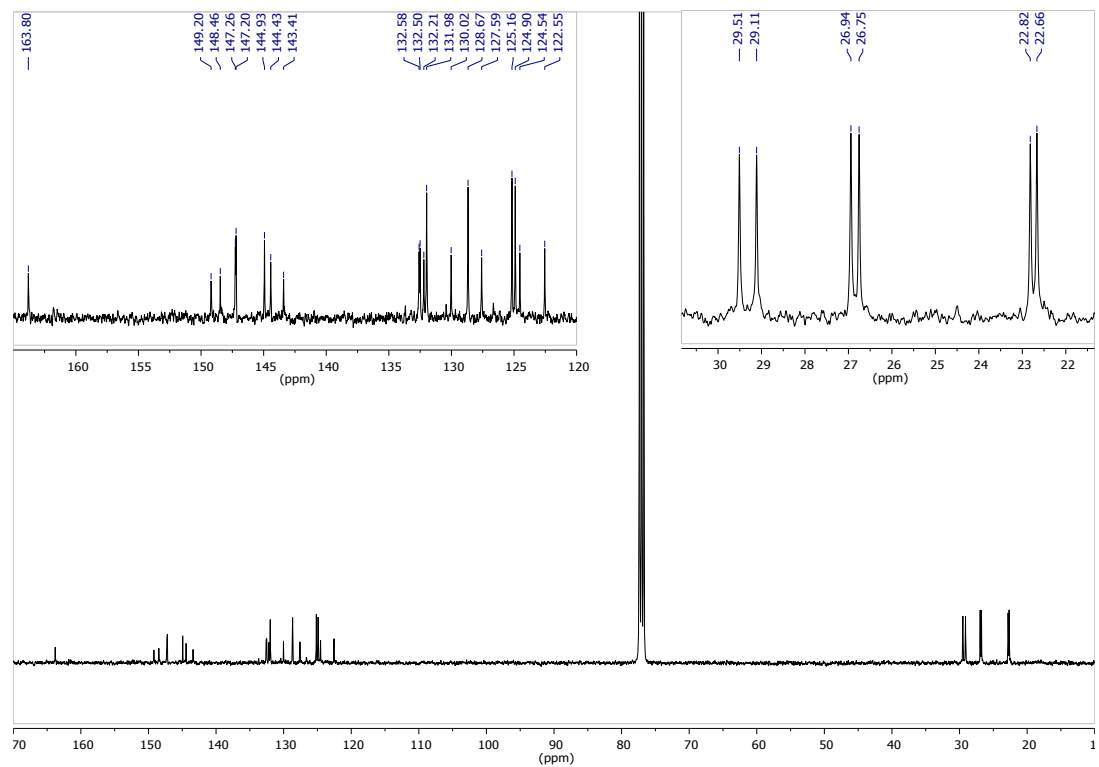

### $^1\text{H}$ - $^1\text{H}$ COSY in $\text{CDCl}_3$

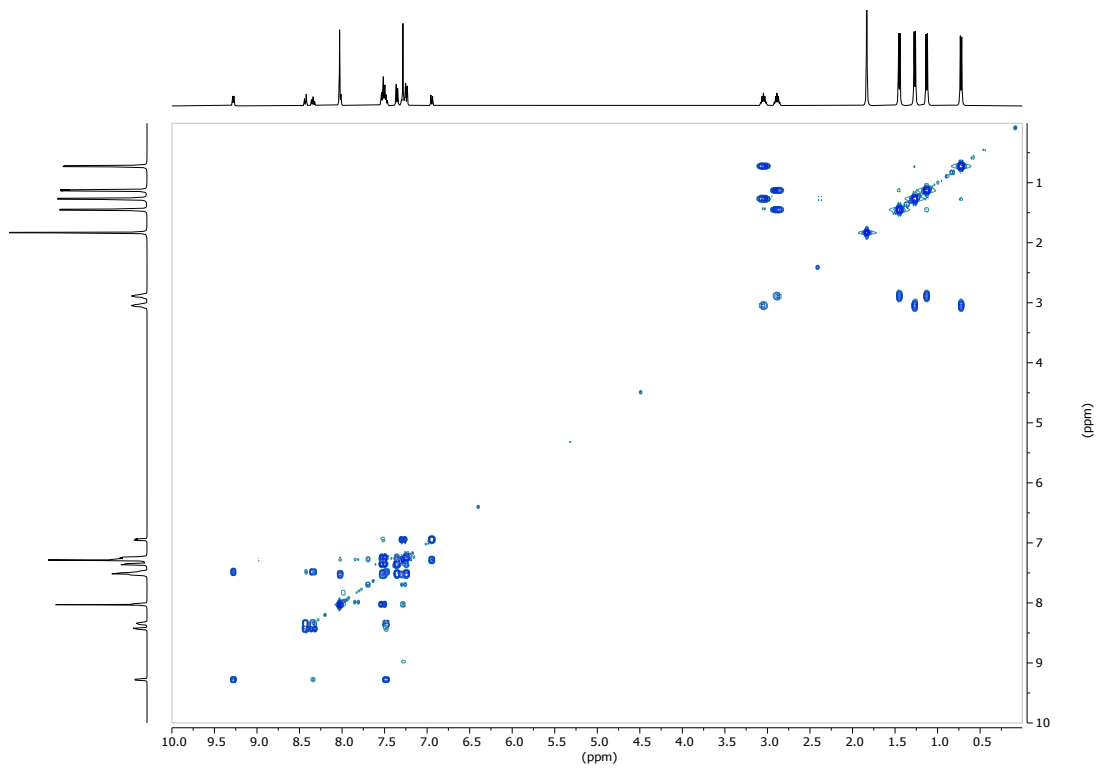

$^1\text{H}$ - $^{13}\text{C}$  HSQC in  $\text{CDCl}_3$

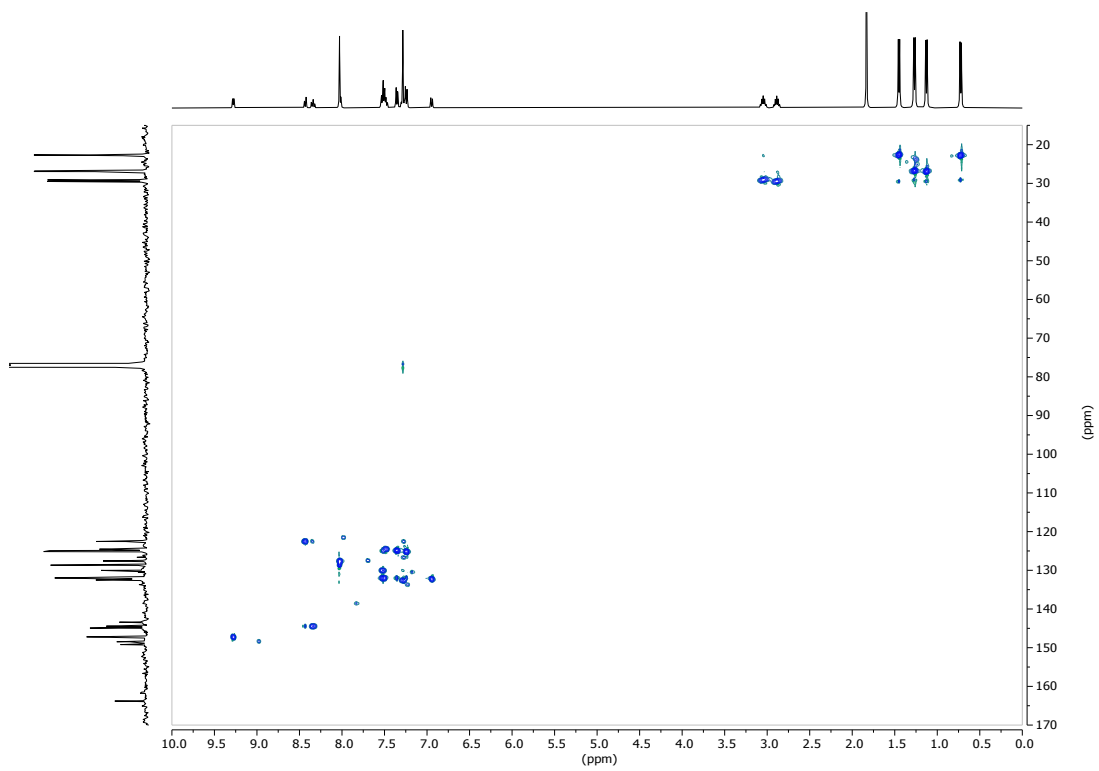

$^1\text{H}$ - $^{13}\text{C}$  HMBC in  $\text{CDCl}_3$



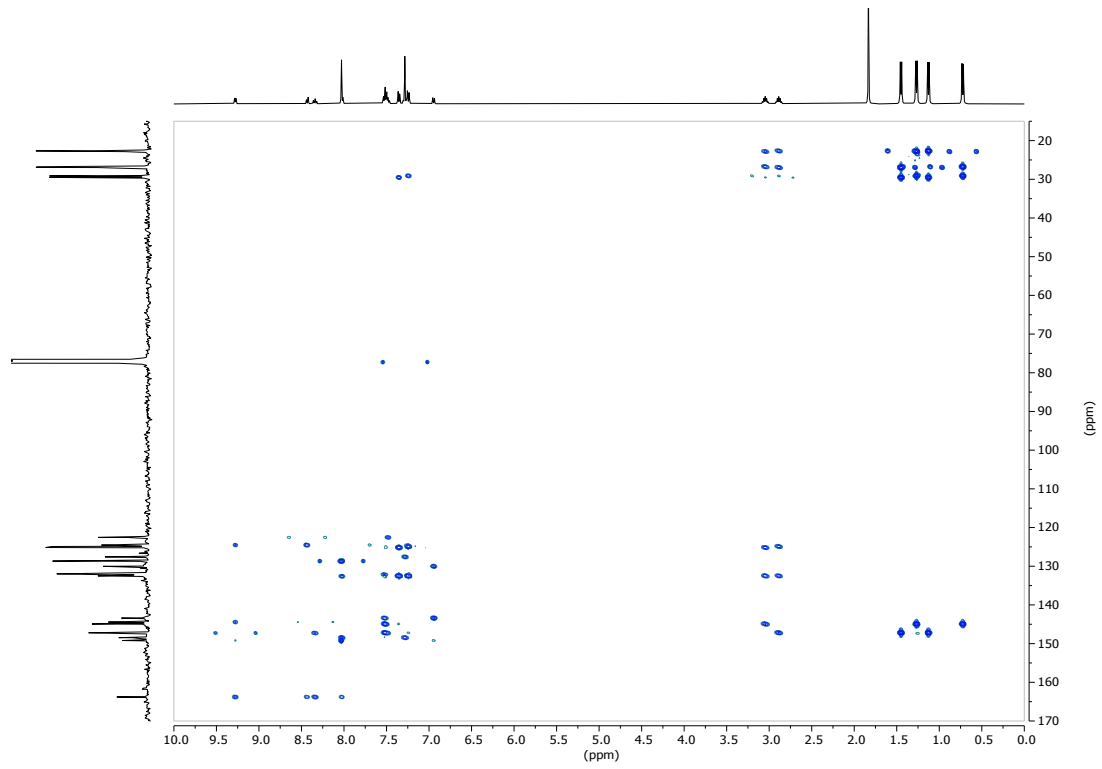

$^1\text{H}$ - $^{15}\text{N}$  NOESY in  $\text{CDCl}_3$

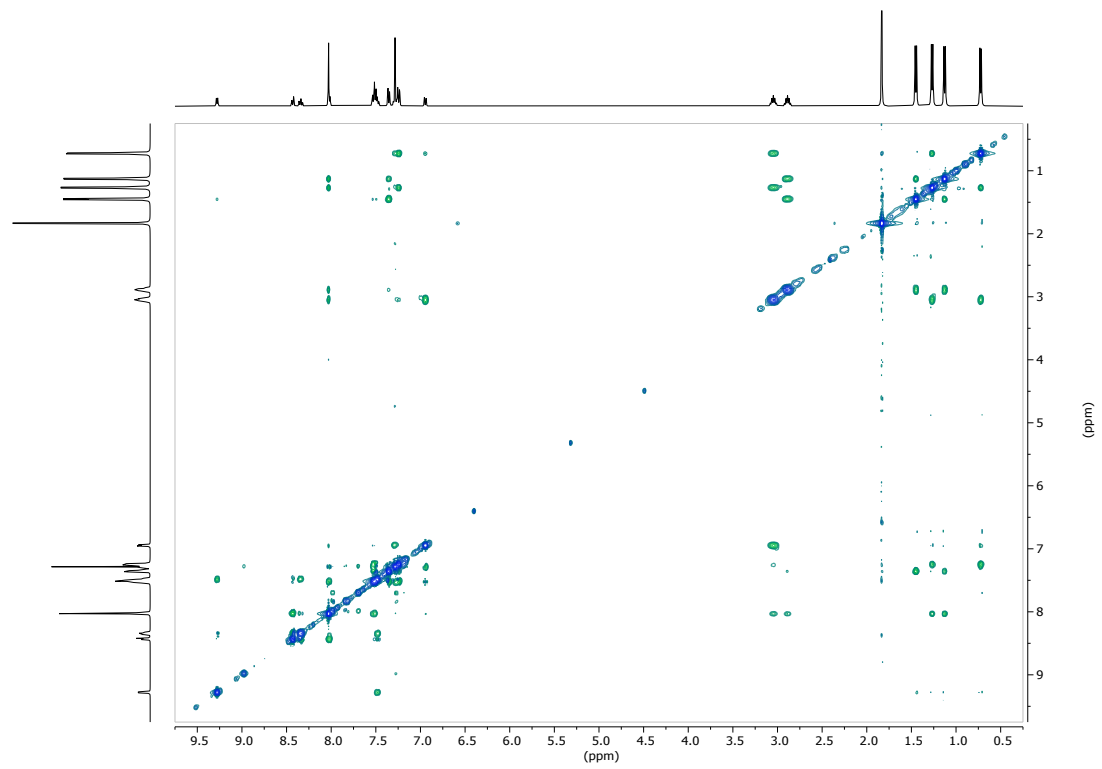

$^1\text{H}$ - $^{15}\text{N}$  HMBC in acetone- $\text{d}_6$

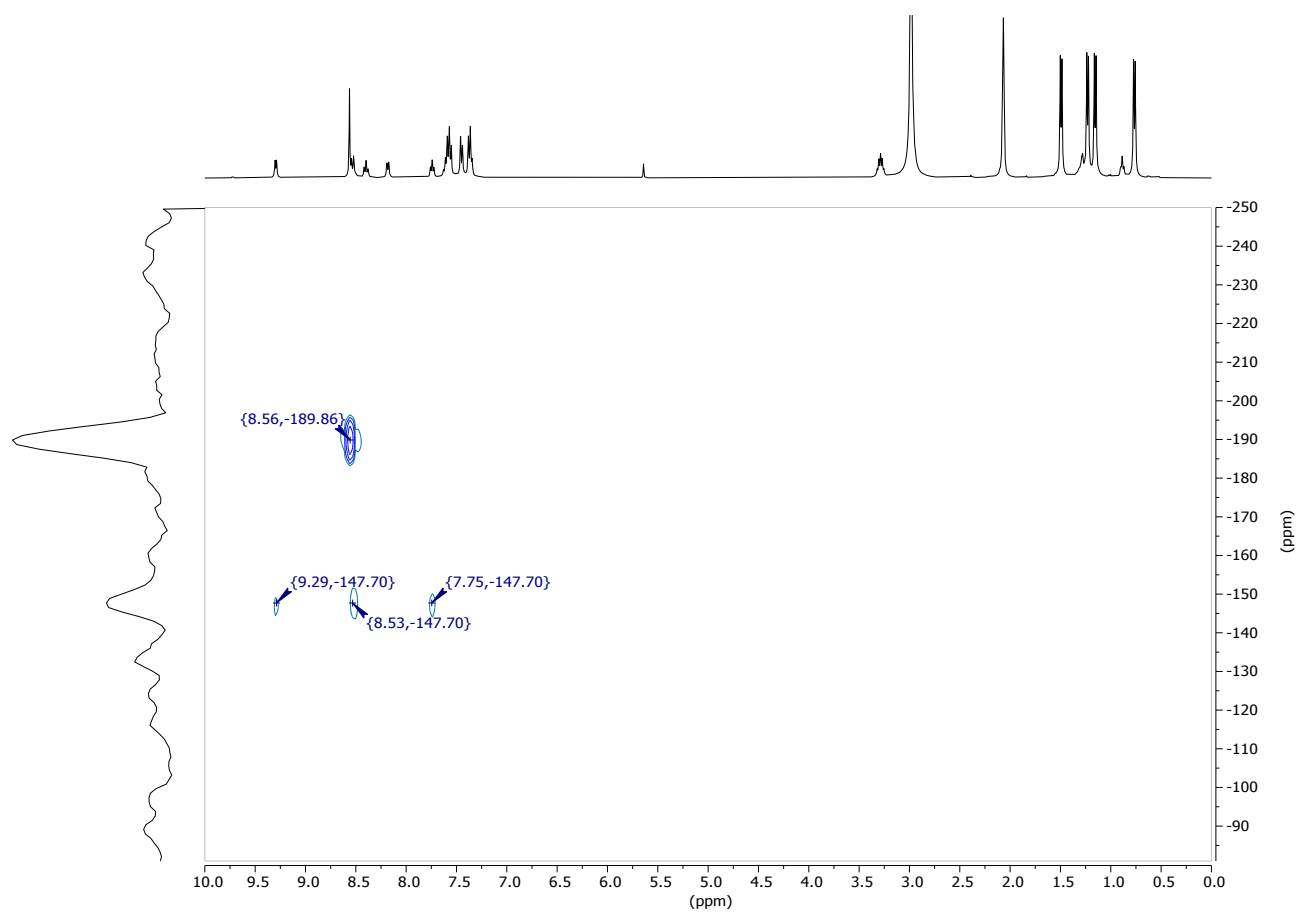

### 5.3 $[\text{AuCl}(\text{PPh}_3)(\text{ppy})]\text{OTf}$ (2)

$^1\text{H}$  NMR in  $\text{CD}_2\text{Cl}_2$

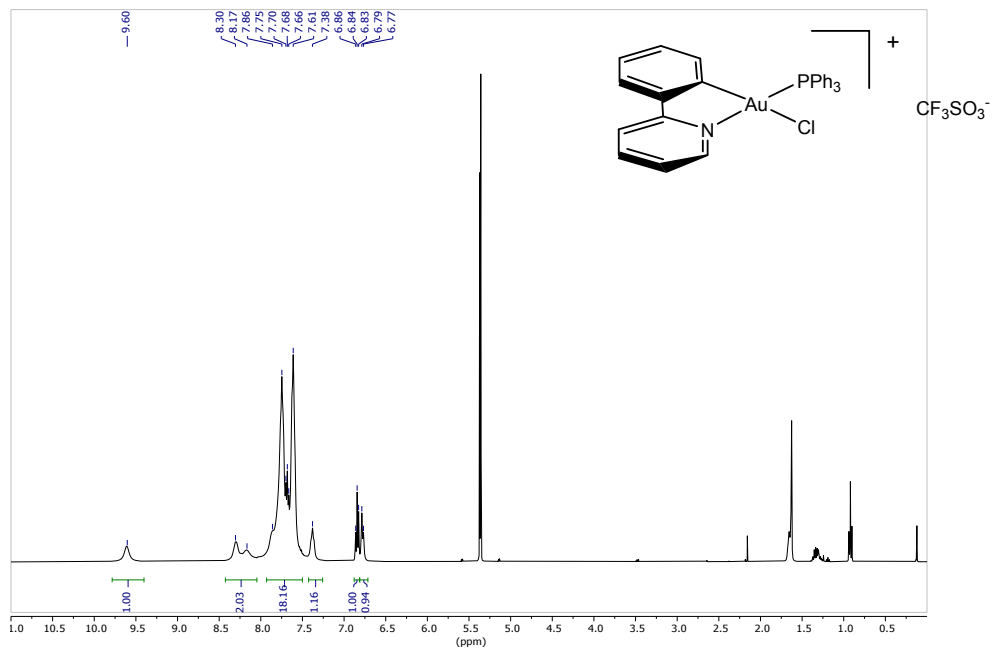

$^{13}\text{C}$   $\{^1\text{H}\}$  NMR in  $\text{CD}_2\text{Cl}_2$

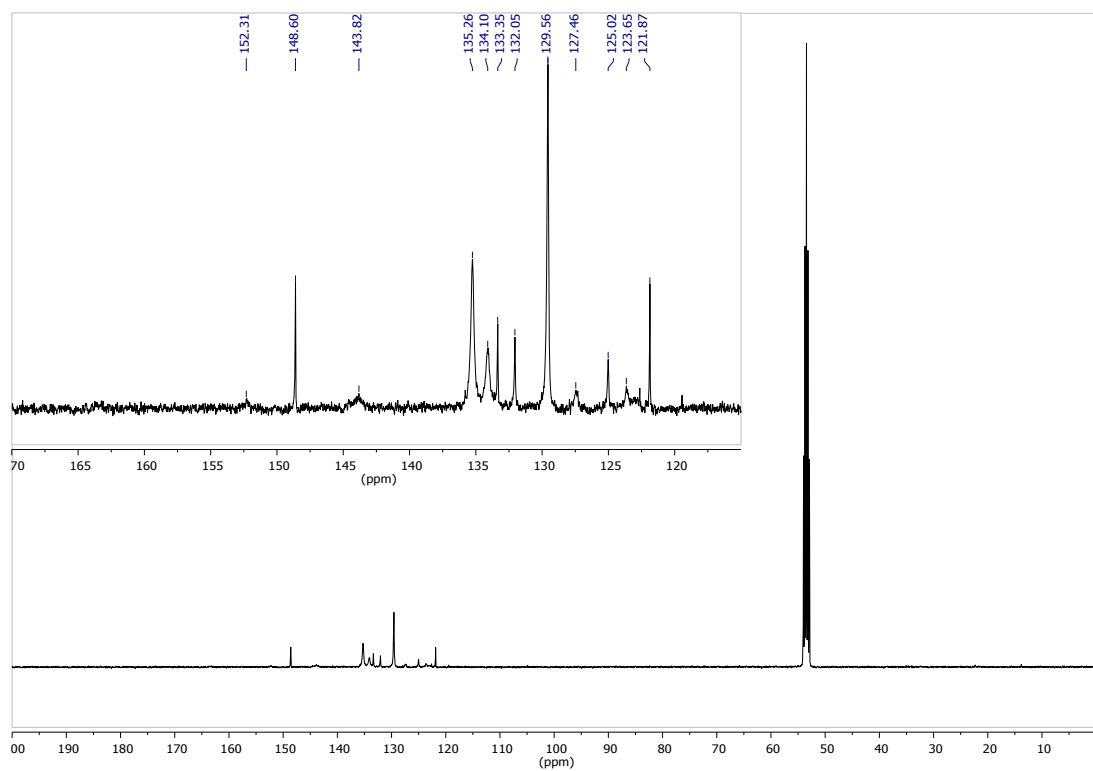

$^{19}\text{F}$  NMR in  $\text{CD}_2\text{Cl}_2$

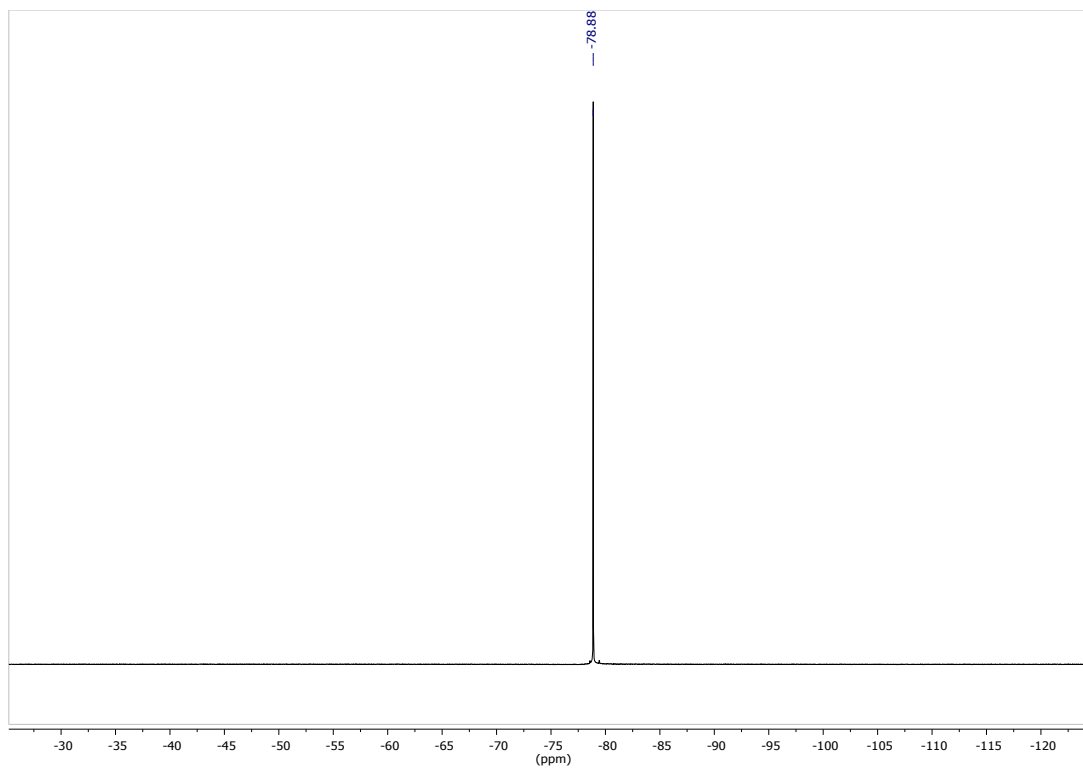

$^{31}\text{P}$  { $^1\text{H}$ } NMR in  $\text{CD}_2\text{Cl}_2$

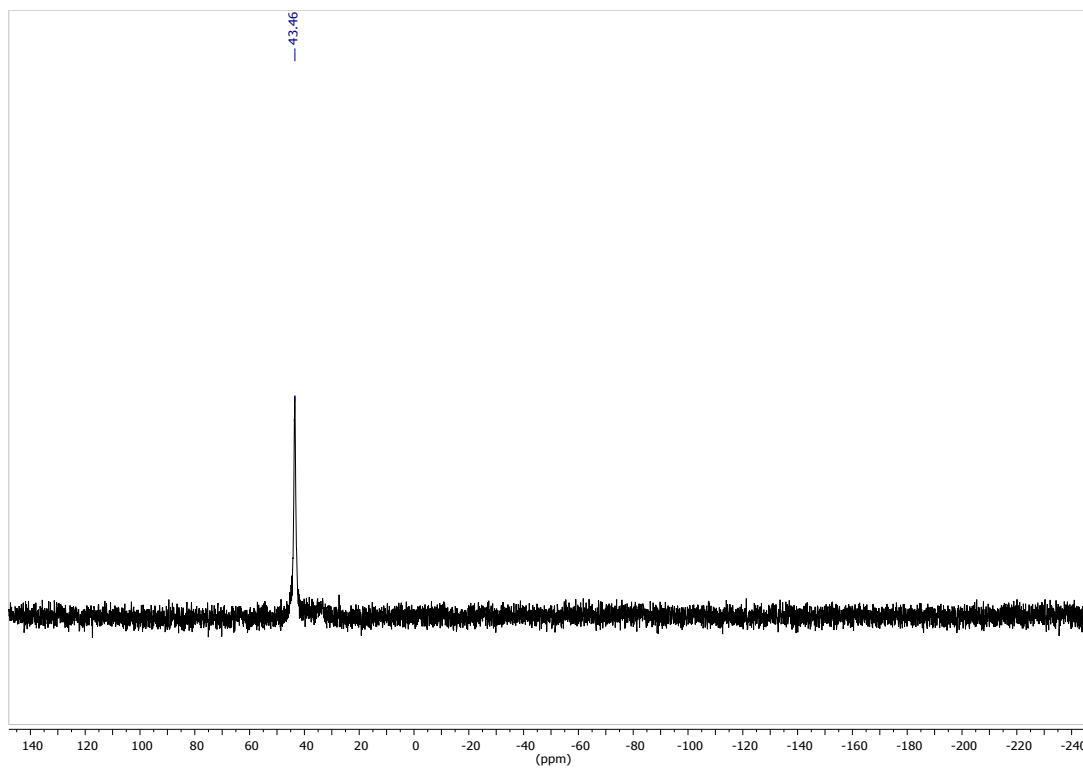

$^1\text{H}$ - $^{13}\text{C}$  HSQC in  $\text{CD}_2\text{Cl}_2$

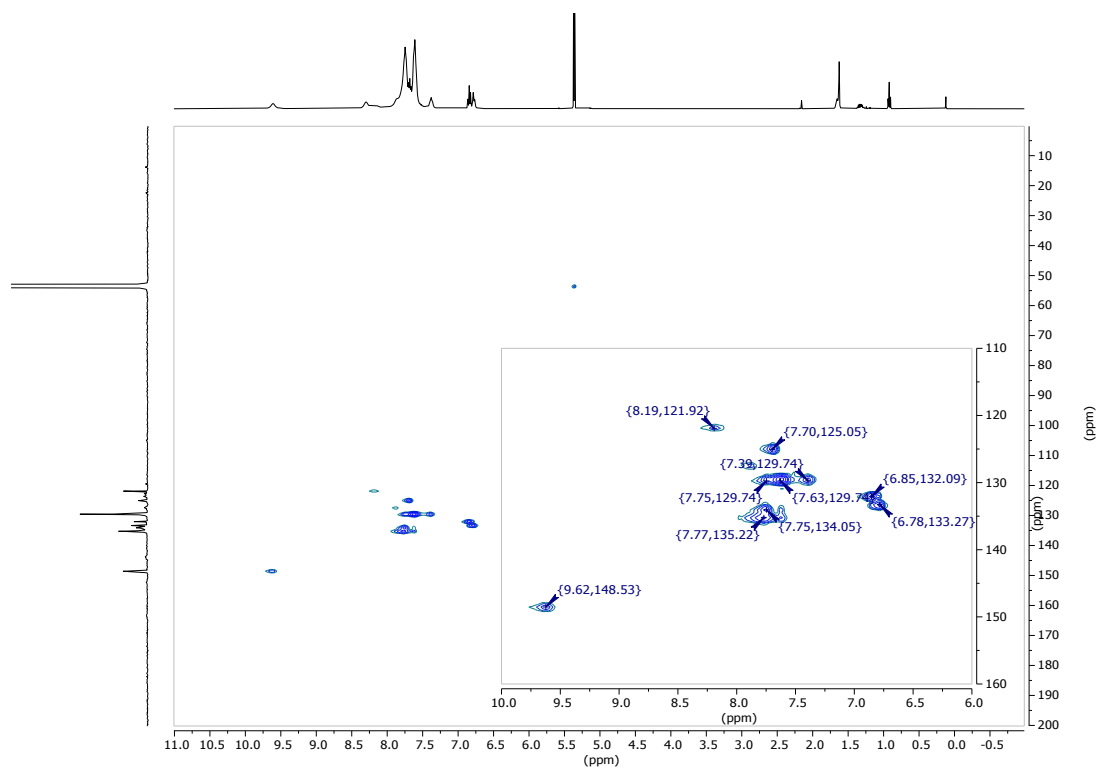

#### 5.4 $[\text{Au}(\text{H}_2\text{O})(\text{NHC})(\text{ppy})](\text{BF}_4)_2$ (3)

$^1\text{H}$  NMR in  $\text{CD}_2\text{Cl}_2$

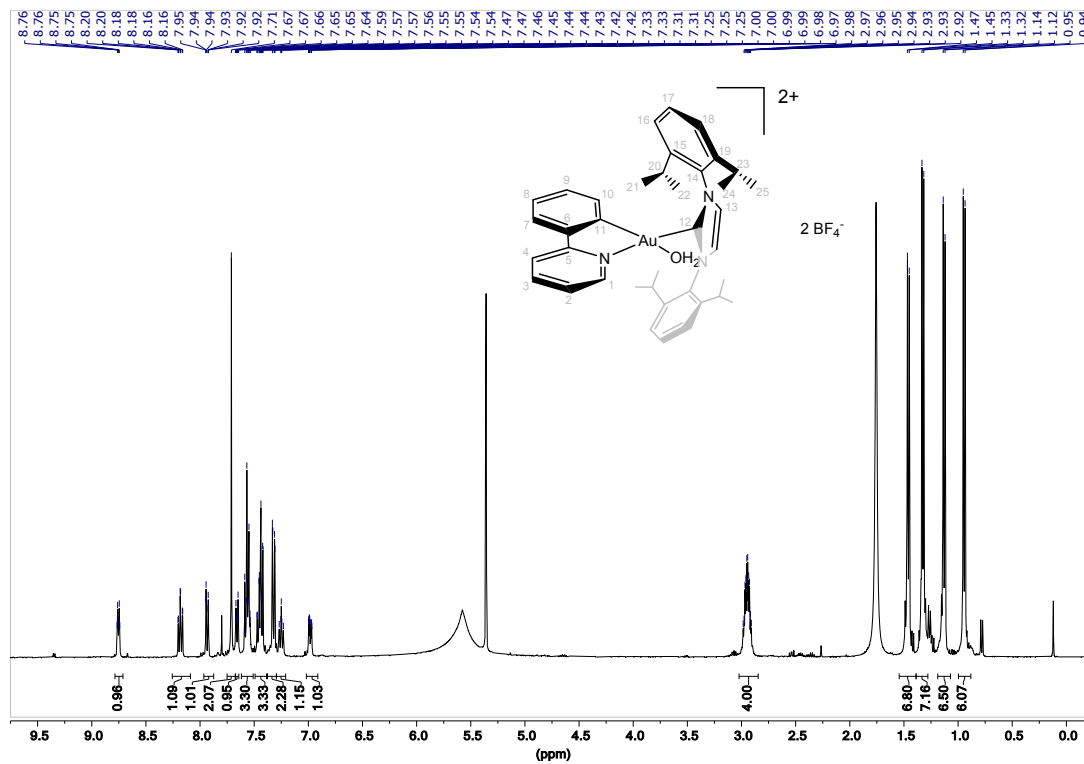

$^{13}\text{C}$   $\{^1\text{H}\}$  NMR

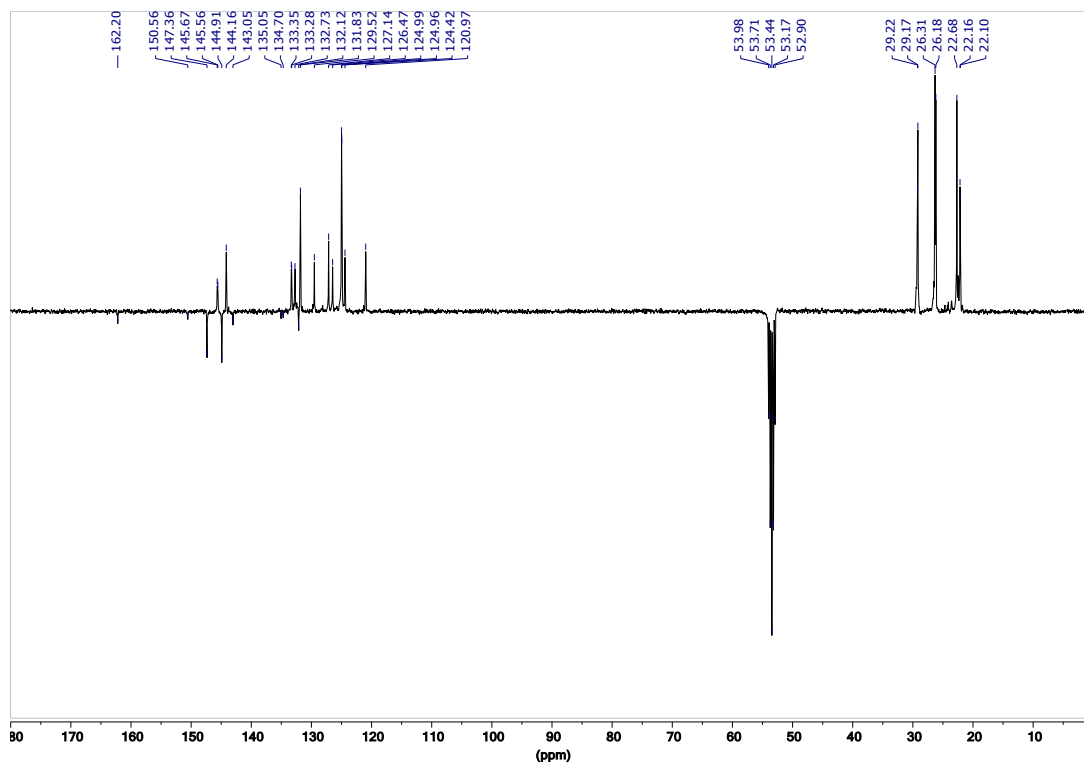

$^{19}\text{F}$  NMR in  $\text{CD}_2\text{Cl}_2$

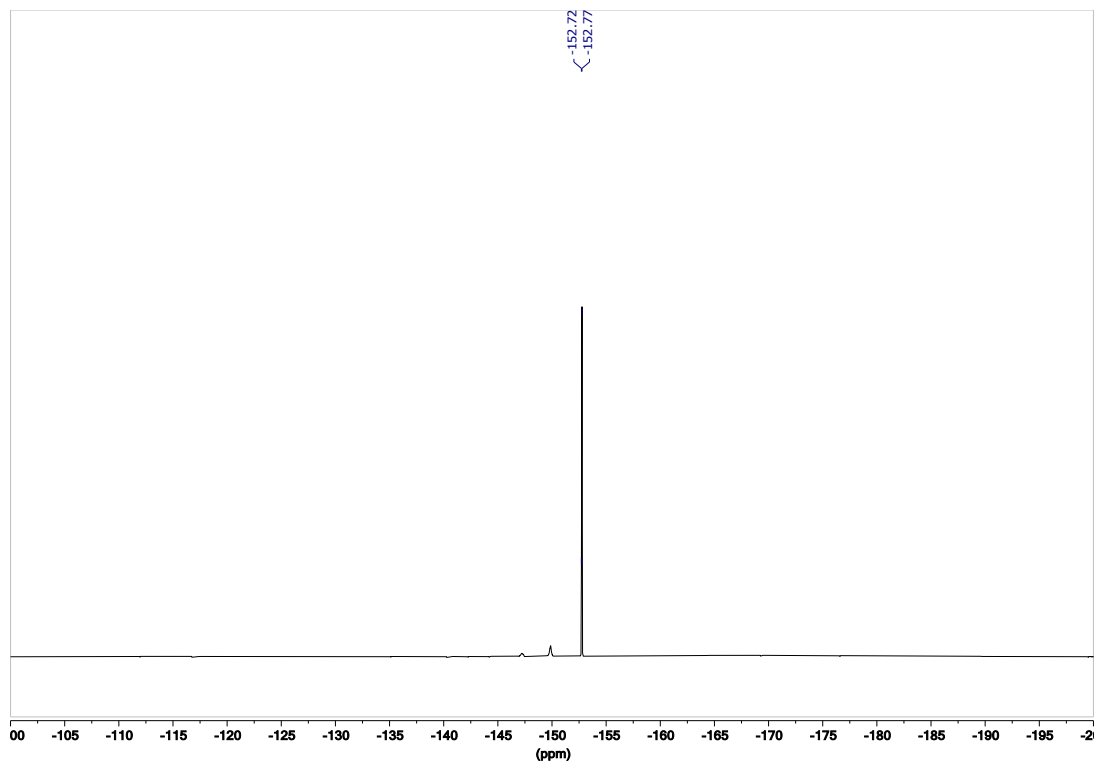

$^1\text{H}$ - $^1\text{H}$  COSY in  $\text{CD}_2\text{Cl}_2$

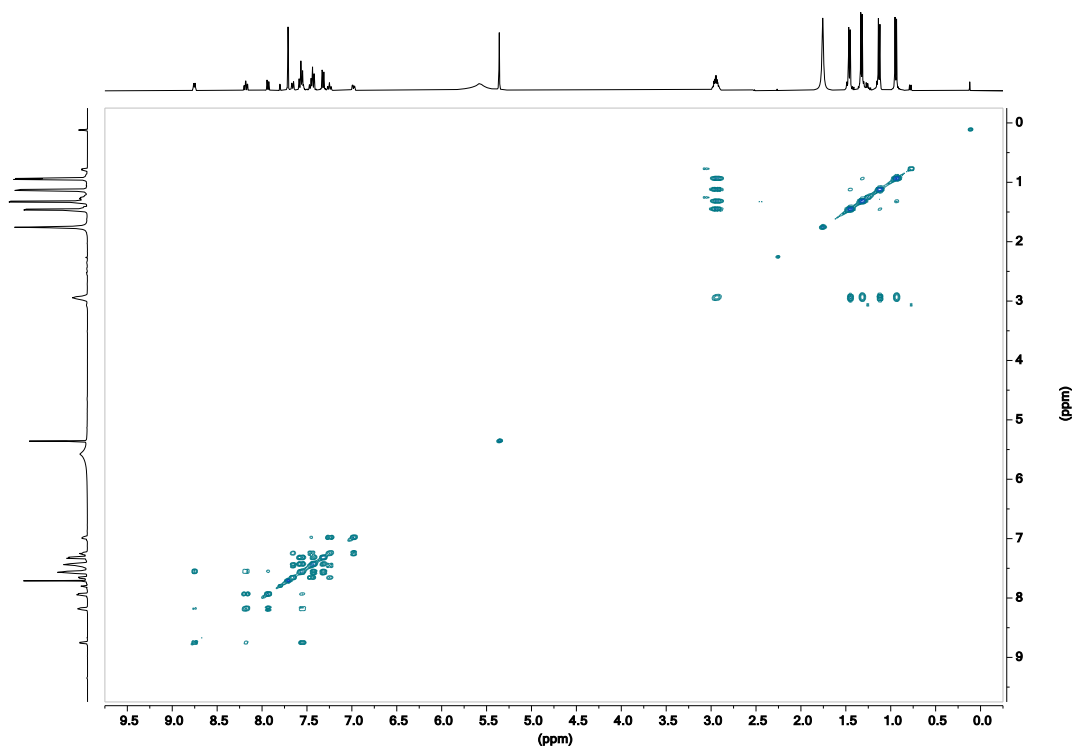

$^1\text{H}$ - $^{13}\text{C}$  HSQC in  $\text{CD}_2\text{Cl}_2$

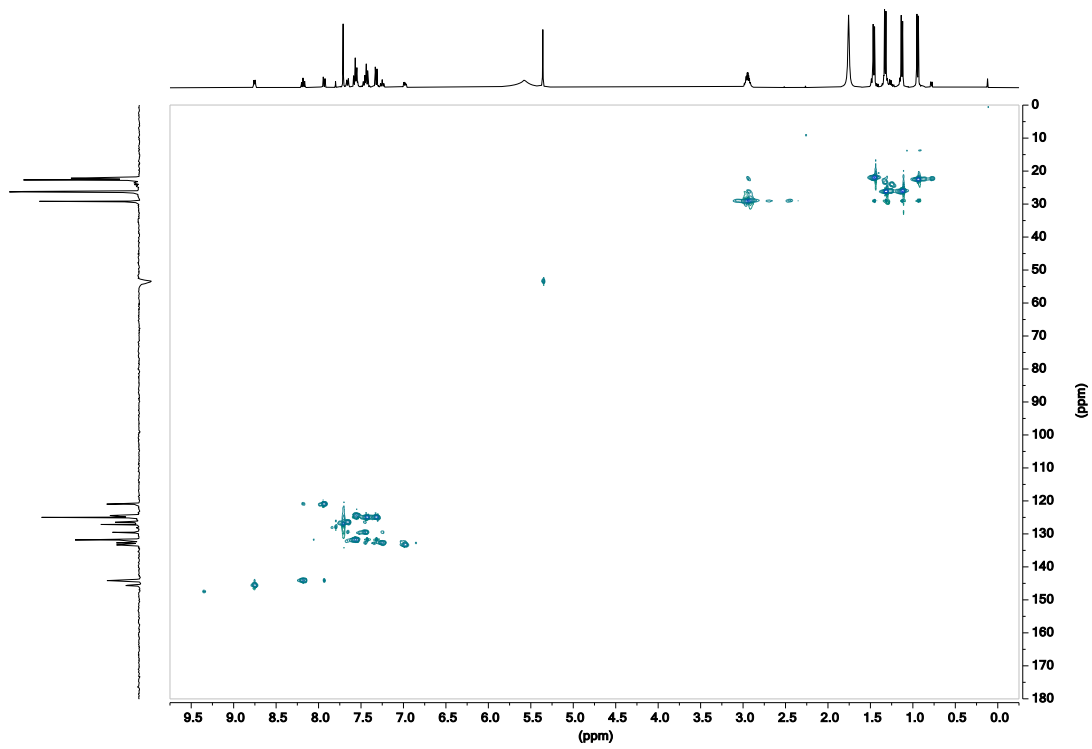

$^1\text{H}$ - $^{13}\text{C}$  HMBC in  $\text{CD}_2\text{Cl}_2$

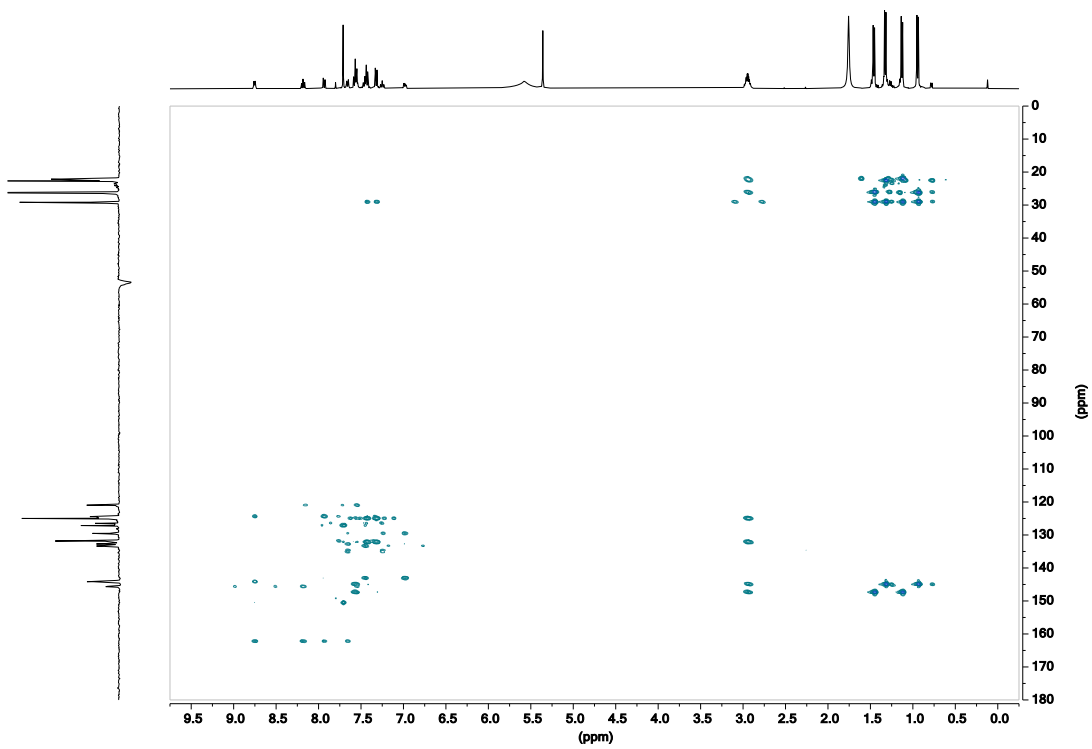

$^1\text{H}$ - $^1\text{H}$  NOESY in  $\text{CD}_2\text{Cl}_2$



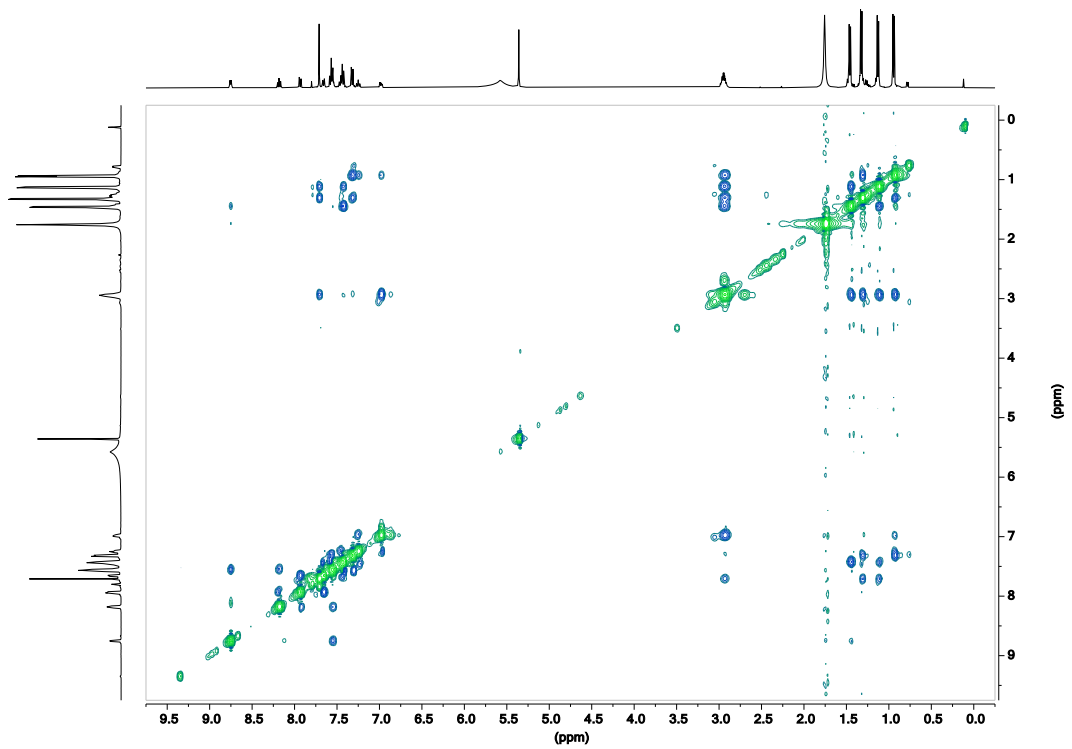

## 6. COMPUTATIONAL DETAILS

For the DFT study, the ADF2014.05<sup>3,4,5</sup> and the related Quantum-regions Interconnected by Local Descriptions (QUILD)<sup>6</sup> programs were used to identify the structures of reactant complexes, reaction intermediates, transition states and product complexes involved in the mechanism of the [(ppy)Au(NHC)(OTf)<sub>2</sub>] - catalyzed addition of water to 2-butyne reaction. Geometry optimization calculations were carried out using the GGA functional BP86<sup>7,8</sup> (BP86). All atoms were treated with a Slater-type TZ2P triple- $\zeta$  with two polarization functions quality basis set, using the frozen core approximation (core small). Relativistic effects were accounted for with the scalar zero-order regular approximation, ZORA model.<sup>9,10,11</sup> Frequency calculations have been also performed to identify all stationary points as minima (zero imaginary frequencies) or transition states (one imaginary frequency). Final energies have been computed using ORCA program package<sup>12</sup> by single point B2PLYP perturbatively corrected doubly hybrid functional<sup>13</sup> calculations performed on the optimized BP86 gas phase structures in conjunction with a def2-TZVP basis set for all atoms and an ECP pseudopotential for gold to include relativistic effects. This computational set up (referred as BP86/B2PLYP) has been proven to be very accurate in describing catalysis by gold-containing species in benchmark calculations.<sup>14,15,16</sup> Computational mechanistic analysis is presented in enthalpy energies, since both the entropic contribution to the reaction profile has been shown to be small (as reported in the Supporting Information of our previous works<sup>17,18,19,20</sup>) and in order to compare the present results with those previously obtained for gold(I) and gold(III) species.<sup>21</sup> All calculations were carried out for the closed-shell singlet state. Explicit dispersion effect has been evaluated by BP86 including Grimme's D3 dispersion correction<sup>22</sup> (BP86+D) single point calculations on optimized BP86 gas phase structures. Solvation has been taken into account by the Conductor like Screening Model COSMO<sup>23,24,25</sup> using nitromethane as solvent ( $\epsilon_{\text{nitromethane}} \sim \epsilon_{\text{valerolactone}}$ ) by single point calculations (BP86+D/COSMO) on optimized BP86 gas phase structures for an estimate of the solvent effect on the activation energy barriers.

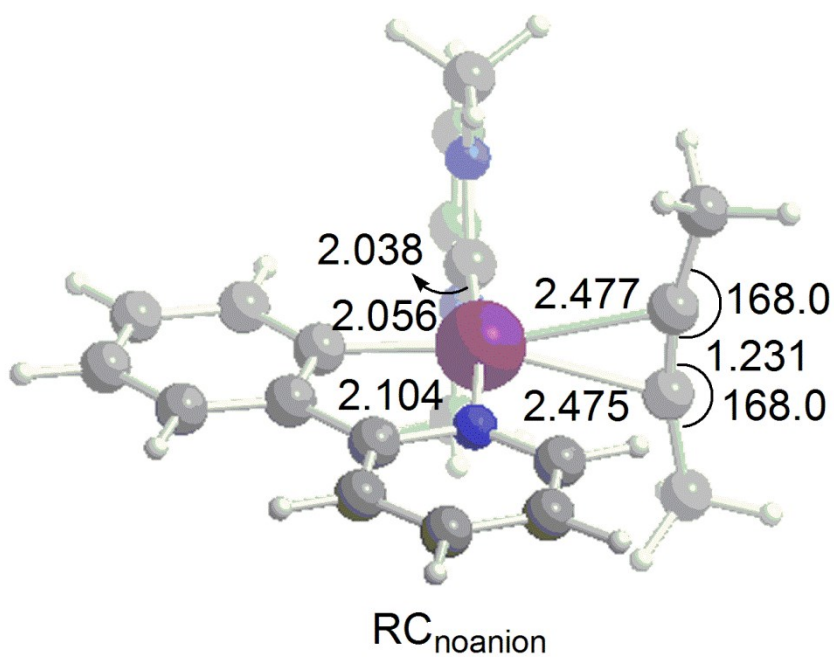

**Figure S1.** Optimized geometry of the reactant complex RC in the absence of both OTs<sup>-</sup> anions. Distances are in Å.

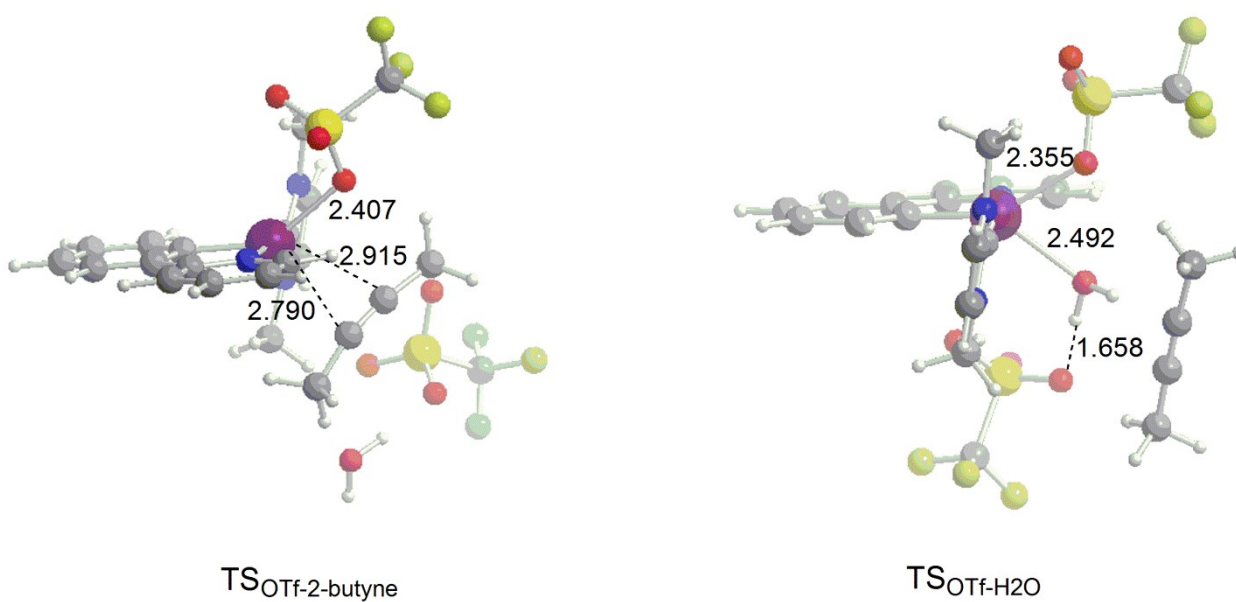

**Figure S2.** Transition state structures for anion displacement by substrate (TS<sub>OTf-2-butyne</sub>) and by water

(TS<sub>OTf-H<sub>2</sub>O</sub>) steps. Distances are in Å.

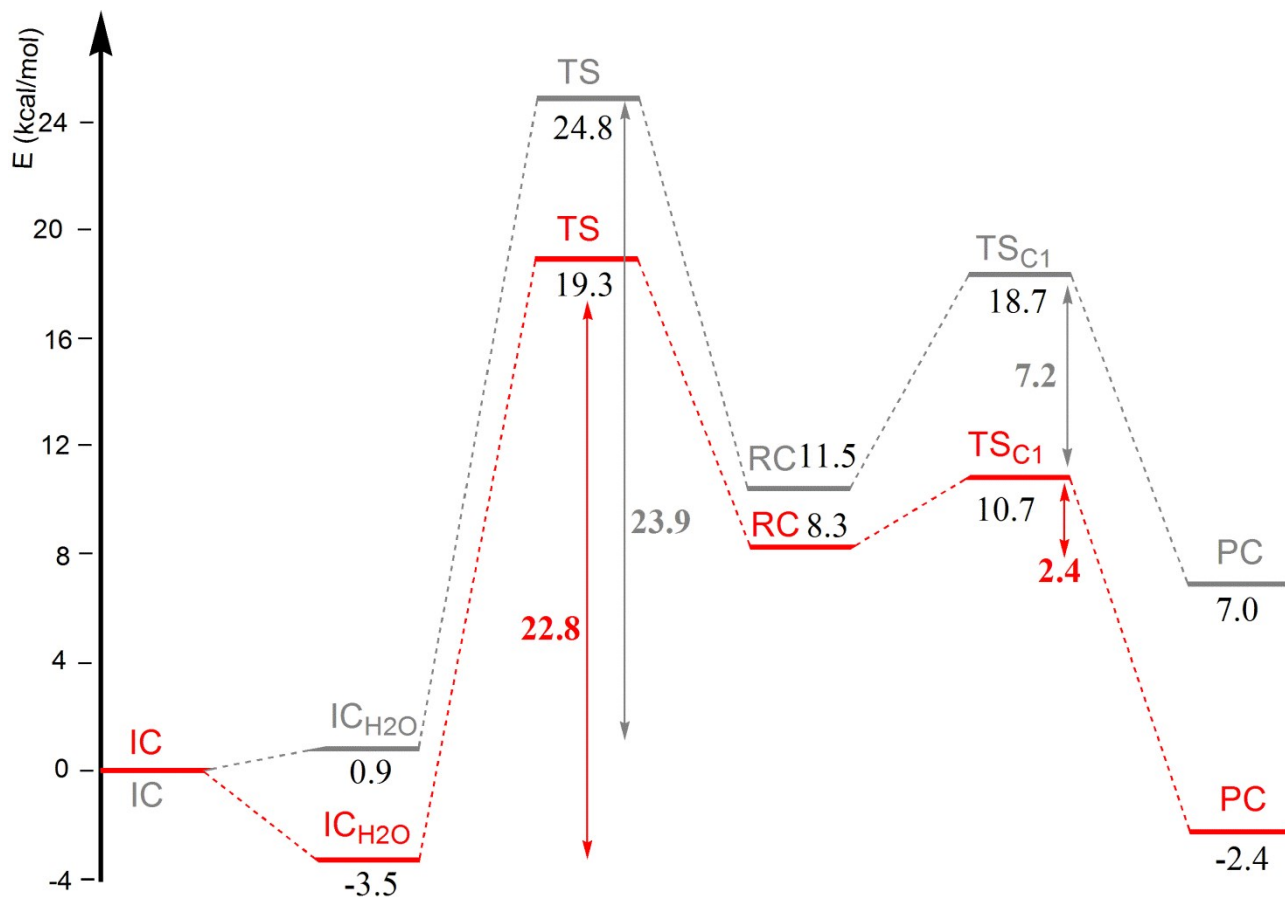

**Figure S3.** Reaction energy profiles for the pre-equilibrium and nucleophilic attack steps calculated at BP86 level of theory in gas phase: electronic energies E (red line) and Gibbs free energies G (blue line). Energy values refer to the corresponding IC taken as zero.

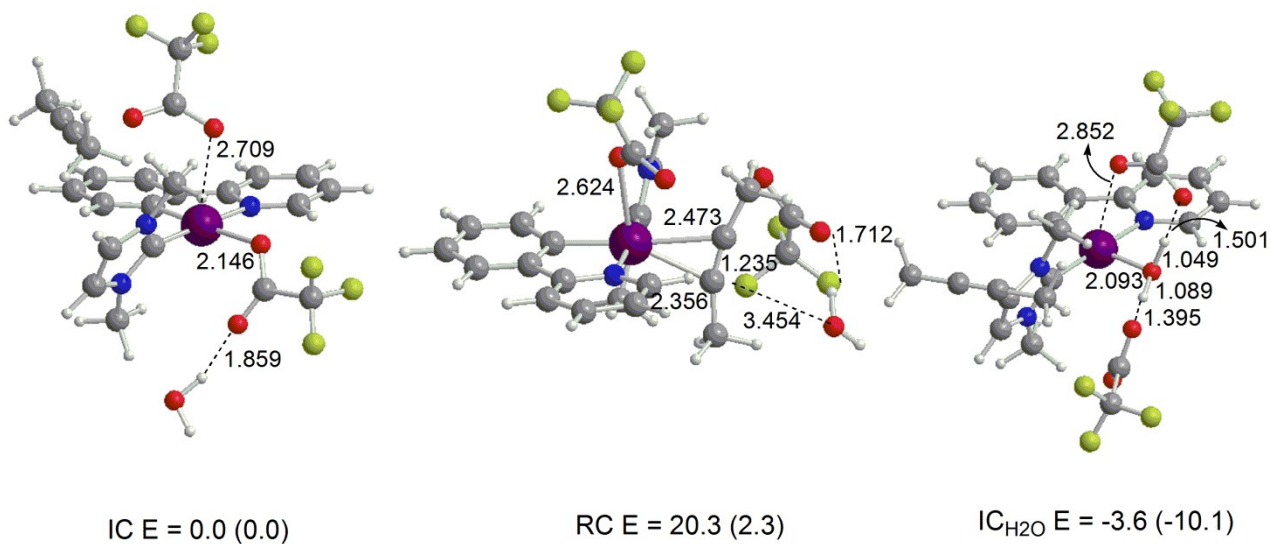

**Figure S4.** Optimized geometries for the initial complex IC, reactant complex RC and water adduct IC<sub>H2O</sub> involving two TFA<sup>-</sup> counterions in the pre-equilibrium step. Distances are in Å. Energy values (BP86/B2PLYP gas phase) refer to the corresponding IC taken as zero (in kcal/mol). Values in parenthesis are calculated at BP86+D/COSMO level.

## Geometries

### RC

65

|    |           |           |           |
|----|-----------|-----------|-----------|
| C  | 3.838283  | -3.201952 | 0.181440  |
| C  | 2.865770  | -2.286503 | -0.247816 |
| C  | 1.695669  | -2.122324 | 0.526995  |
| C  | 1.514927  | -2.850904 | 1.696768  |
| C  | 2.498385  | -3.757742 | 2.108983  |
| C  | 3.655113  | -3.933668 | 1.350712  |
| C  | 3.018549  | -1.453010 | -1.439253 |
| N  | 1.972258  | -0.614569 | -1.694860 |
| C  | 2.024809  | 0.266379  | -2.709322 |
| C  | 3.118168  | 0.329685  | -3.560434 |
| C  | 4.184640  | -0.539092 | -3.342846 |
| C  | 4.133947  | -1.429953 | -2.278666 |
| AU | 0.415270  | -0.730394 | -0.276059 |
| C  | -1.075730 | 0.236264  | -1.818890 |
| C  | -0.986078 | -1.048621 | 1.154812  |
| N  | -1.142702 | -0.388291 | 2.325458  |
| C  | -2.182391 | -0.950792 | 3.040411  |
| C  | -2.659821 | -1.989237 | 2.306213  |
| N  | -1.902194 | -2.046260 | 1.152002  |
| C  | -0.430602 | 0.813913  | 2.762871  |
| C  | -2.156989 | -2.991950 | 0.068721  |
| O  | 2.145447  | 1.108309  | 0.981850  |
| S  | 3.155379  | 1.909382  | 0.235799  |
| C  | 3.858753  | 3.007014  | 1.593082  |
| F  | 4.789661  | 3.849476  | 1.098969  |
| O  | 2.565069  | 2.850990  | -0.724881 |
| O  | 4.306277  | 1.138807  | -0.237504 |
| F  | 2.877928  | 3.749023  | 2.164564  |
| F  | 4.436140  | 2.259611  | 2.562987  |
| H  | 0.624539  | -2.722909 | 2.308418  |
| H  | 2.354528  | -4.321780 | 3.030384  |
| H  | 4.421708  | -4.635502 | 1.676035  |
| H  | 4.752893  | -3.335400 | -0.394727 |
| H  | 4.973595  | -2.089084 | -2.074240 |
| H  | 5.063327  | -0.506304 | -3.985368 |
| H  | 3.128834  | 1.065641  | -4.360695 |
| H  | 1.170030  | 0.929142  | -2.818063 |
| H  | -3.486101 | -2.664160 | 2.481762  |

|   |           |           |           |
|---|-----------|-----------|-----------|
| H | -2.509045 | -0.541195 | 3.986294  |
| H | -1.281013 | -3.026066 | -0.585195 |
| H | -2.326905 | -3.986338 | 0.494772  |
| H | -3.038170 | -2.649323 | -0.486613 |
| H | 0.447389  | 0.983904  | 2.130155  |
| H | -1.116238 | 1.666384  | 2.702024  |
| H | -0.104923 | 0.674535  | 3.799347  |
| C | -0.828822 | 1.232397  | -1.133751 |
| C | -1.628055 | -0.650330 | -2.839733 |
| C | -0.711879 | 2.530648  | -0.501202 |
| H | -2.445789 | -1.247730 | -2.416672 |
| H | -2.060029 | 0.009171  | -3.610320 |
| H | -0.871009 | -1.304164 | -3.290766 |
| H | 0.337030  | 2.808763  | -0.326364 |
| H | -1.162598 | 3.251000  | -1.202395 |
| H | -1.298910 | 2.555227  | 0.425238  |
| O | -2.900411 | 2.171659  | -3.538055 |
| H | -3.443914 | 2.724515  | -4.121444 |
| H | -3.478529 | 2.007561  | -2.750290 |
| O | -4.407629 | 1.701587  | -1.259067 |
| S | -4.294577 | 0.684544  | -0.198904 |
| C | -6.016378 | 0.676474  | 0.559961  |
| O | -4.136060 | -0.700485 | -0.679658 |
| O | -3.427718 | 1.054716  | 0.929493  |
| F | -6.083281 | -0.243039 | 1.560463  |
| F | -6.324655 | 1.882685  | 1.083764  |
| F | -6.956379 | 0.360295  | -0.357100 |

## TSC1

65

|    |           |           |           |
|----|-----------|-----------|-----------|
| C  | -3.925376 | -3.199533 | -0.411789 |
| C  | -2.948860 | -2.325884 | 0.090312  |
| C  | -1.716337 | -2.207059 | -0.590508 |
| C  | -1.479289 | -2.951162 | -1.741689 |
| C  | -2.464342 | -3.817990 | -2.229600 |
| C  | -3.683556 | -3.942074 | -1.563725 |
| C  | -3.152143 | -1.491580 | 1.274691  |
| N  | -2.096777 | -0.691059 | 1.608886  |
| C  | -2.186087 | 0.177475  | 2.631682  |
| C  | -3.328549 | 0.266855  | 3.412711  |
| C  | -4.407147 | -0.561887 | 3.113879  |
| C  | -4.317731 | -1.440220 | 2.042021  |
| AU | -0.441994 | -0.863365 | 0.323299  |
| C  | 0.863764  | 0.331162  | 1.652212  |
| C  | 1.065192  | -1.234561 | -0.973909 |
| N  | 1.319536  | -0.621001 | -2.153087 |
| C  | 2.410970  | -1.211821 | -2.762195 |
| C  | 2.824456  | -2.220397 | -1.951881 |
| N  | 1.977000  | -2.230269 | -0.860125 |
| C  | 0.638052  | 0.555777  | -2.692927 |
| C  | 2.144367  | -3.125976 | 0.279731  |
| O  | -1.910459 | 1.321935  | -0.975959 |
| S  | -3.079449 | 1.960267  | -0.303185 |
| C  | -3.660399 | 3.179481  | -1.613212 |
| F  | -4.706299 | 3.905591  | -1.165198 |
| O  | -2.707008 | 2.803434  | 0.837971  |
| O  | -4.221940 | 1.066387  | -0.111826 |

|   |           |           |           |
|---|-----------|-----------|-----------|
| F | -2.662598 | 4.036675  | -1.946256 |
| F | -4.044822 | 2.531550  | -2.737528 |
| H | -0.537773 | -2.864952 | -2.281335 |
| H | -2.274308 | -4.392626 | -3.136192 |
| H | -4.451150 | -4.612794 | -1.947520 |
| H | -4.886940 | -3.292990 | 0.091374  |
| H | -5.162893 | -2.069665 | 1.776371  |
| H | -5.323530 | -0.508304 | 3.700002  |
| H | -3.367040 | 0.992984  | 4.221003  |
| H | -1.320090 | 0.812850  | 2.799026  |
| H | 3.658678  | -2.903065 | -2.034426 |
| H | 2.810565  | -0.842479 | -3.696535 |
| H | 1.240429  | -3.088523 | 0.893987  |
| H | 2.290819  | -4.148867 | -0.083422 |
| H | 3.013328  | -2.794980 | 0.859771  |
| H | -0.310678 | 0.712979  | -2.170166 |
| H | 1.289082  | 1.427695  | -2.563534 |
| H | 0.441779  | 0.393210  | -3.758125 |
| C | 0.858218  | 1.515759  | 1.215553  |
| C | 1.500119  | -0.431906 | 2.763268  |
| C | 0.600521  | 2.668144  | 0.394056  |
| H | 2.422969  | -0.902160 | 2.395029  |
| H | 1.772196  | 0.263684  | 3.565868  |
| H | 0.839093  | -1.210283 | 3.163990  |
| H | -0.201462 | 2.385116  | -0.316324 |
| H | 0.190601  | 3.498741  | 0.982639  |
| H | 1.505272  | 2.970307  | -0.149938 |
| O | 2.285437  | 2.541719  | 2.721232  |
| H | 2.273666  | 3.496895  | 2.539639  |
| H | 3.125570  | 2.208028  | 2.274755  |
| O | 4.440599  | 1.578543  | 1.513272  |
| S | 4.375924  | 0.669913  | 0.344564  |
| C | 6.134560  | 0.759463  | -0.316685 |
| O | 4.209310  | -0.750721 | 0.689735  |
| O | 3.551583  | 1.153431  | -0.770324 |
| F | 6.268410  | -0.054209 | -1.395686 |
| F | 6.444563  | 2.016597  | -0.700012 |
| F | 7.027744  | 0.367852  | 0.616245  |

## TSC2

65

|    |           |           |           |
|----|-----------|-----------|-----------|
| C  | 3.698335  | -3.424632 | 0.214788  |
| C  | 2.781425  | -2.441680 | -0.188792 |
| C  | 1.630657  | -2.211238 | 0.597817  |
| C  | 1.418073  | -2.947104 | 1.758749  |
| C  | 2.342764  | -3.923655 | 2.146880  |
| C  | 3.479589  | -4.161629 | 1.374712  |
| C  | 2.967619  | -1.610659 | -1.378163 |
| N  | 1.961681  | -0.720265 | -1.628001 |
| C  | 2.050925  | 0.149706  | -2.650066 |
| C  | 3.136048  | 0.150406  | -3.513825 |
| C  | 4.161507  | -0.766036 | -3.298043 |
| C  | 4.077047  | -1.644506 | -2.225773 |
| AU | 0.425492  | -0.731672 | -0.188718 |
| C  | -1.288160 | 0.311006  | -2.098952 |



|   |           |           |           |
|---|-----------|-----------|-----------|
| C | -0.957915 | -0.926115 | 1.274921  |
| N | -1.010634 | -0.264962 | 2.456472  |
| C | -2.071272 | -0.738002 | 3.207639  |
| C | -2.674028 | -1.713682 | 2.479160  |
| N | -1.968193 | -1.827860 | 1.297029  |
| C | -0.117744 | 0.805776  | 2.908253  |
| C | -2.350396 | -2.720814 | 0.204076  |
| O | 2.312464  | 1.097612  | 0.957814  |
| S | 3.232002  | 1.907683  | 0.114340  |
| C | 3.943488  | 3.119102  | 1.366929  |
| F | 4.816033  | 3.967312  | 0.782514  |
| O | 2.538072  | 2.762672  | -0.859848 |
| O | 4.397736  | 1.176244  | -0.383384 |
| F | 2.956227  | 3.856481  | 1.935705  |
| F | 4.591963  | 2.459566  | 2.355314  |
| H | 0.541902  | -2.773743 | 2.380853  |
| H | 2.170716  | -4.494045 | 3.059669  |
| H | 4.201418  | -4.917523 | 1.681001  |
| H | 4.595420  | -3.610686 | -0.374477 |
| H | 4.885554  | -2.341995 | -2.023189 |
| H | 5.035523  | -0.780145 | -3.947590 |
| H | 3.176650  | 0.880216  | -4.318635 |
| H | 1.233186  | 0.857262  | -2.751552 |
| H | -3.555134 | -2.307994 | 2.678680  |
| H | -2.315042 | -0.321149 | 4.175237  |
| H | -1.463655 | -2.937252 | -0.399191 |
| H | -2.729667 | -3.655044 | 0.630571  |
| H | -3.126699 | -2.229060 | -0.398258 |
| H | 0.691288  | 0.954984  | 2.184114  |
| H | -0.695535 | 1.730422  | 3.018374  |
| H | 0.313630  | 0.526591  | 3.876037  |
| C | -0.778055 | 0.914970  | -1.118422 |
| C | -1.687011 | -0.745923 | -3.013476 |
| C | -0.733018 | 2.236723  | -0.449794 |
| H | -2.760752 | -0.950427 | -2.898019 |
| H | -1.480193 | -0.466446 | -4.052988 |
| H | -1.125966 | -1.662626 | -2.779383 |
| H | 0.302863  | 2.571757  | -0.309359 |
| H | -1.281040 | 2.969953  | -1.054367 |
| H | -1.240331 | 2.171834  | 0.520665  |
| O | -2.585798 | 1.784414  | -3.258217 |
| H | -2.190559 | 2.672885  | -3.237064 |
| H | -3.329400 | 1.818327  | -2.572776 |
| O | -4.426289 | 1.824192  | -1.364734 |
| S | -4.472325 | 0.705753  | -0.392581 |
| C | -6.235753 | 0.811420  | 0.253717  |
| O | -4.404349 | -0.631315 | -1.008902 |
| O | -3.648812 | 0.892725  | 0.806107  |
| F | -6.441864 | -0.149234 | 1.190753  |
| F | -6.469352 | 2.011885  | 0.825441  |
| F | -7.133230 | 0.629926  | -0.736975 |

## PCC1

65

|   |           |          |           |
|---|-----------|----------|-----------|
| N | -1.981167 | 2.129051 | -0.927322 |
|---|-----------|----------|-----------|

|    |           |           |           |
|----|-----------|-----------|-----------|
| C  | -0.917403 | 1.296255  | -1.065130 |
| N  | -1.021888 | 0.764537  | -2.308776 |
| C  | -2.156235 | 1.251548  | -2.938659 |
| C  | -2.758395 | 2.107039  | -2.073474 |
| AU | 0.542155  | 0.958024  | 0.277644  |
| C  | -0.784551 | -0.218921 | 1.445490  |
| C  | -1.269161 | 0.445158  | 2.715659  |
| C  | -0.084868 | -0.166577 | -2.943453 |
| C  | -2.282954 | 2.952879  | 0.239736  |
| C  | 1.901812  | 2.271705  | -0.607107 |
| C  | 3.127361  | 2.334319  | 0.098590  |
| C  | 4.148540  | 3.192513  | -0.337542 |
| C  | 3.963014  | 3.989425  | -1.463685 |
| C  | 2.755582  | 3.934939  | -2.161427 |
| C  | 1.733807  | 3.081386  | -1.730538 |
| C  | 3.271837  | 1.451225  | 1.259188  |
| N  | 2.171895  | 0.697974  | 1.565759  |
| C  | 2.212048  | -0.213013 | 2.555245  |
| C  | 3.343166  | -0.390493 | 3.337400  |
| C  | 4.466060  | 0.388766  | 3.070626  |
| C  | 4.429459  | 1.305742  | 2.028771  |
| C  | -1.198702 | -1.439074 | 1.091392  |
| C  | -0.805987 | -2.310935 | -0.049016 |
| O  | -2.207027 | -2.061340 | 1.926057  |
| O  | -4.362445 | -0.749303 | 1.760556  |
| S  | -4.866118 | -0.399344 | 0.321490  |
| O  | -4.053644 | -1.026563 | -0.701858 |
| C  | -6.514798 | -1.315583 | 0.328956  |
| F  | -7.301133 | -0.867493 | 1.319272  |
| O  | -5.196265 | 1.008953  | 0.255325  |
| F  | -7.125356 | -1.109950 | -0.851098 |
| F  | -6.304926 | -2.635033 | 0.493091  |
| O  | 2.171687  | -1.249509 | -1.080341 |
| S  | 3.098328  | -2.096674 | -0.286217 |
| O  | 4.373023  | -1.457223 | 0.043485  |
| C  | 3.561842  | -3.432020 | -1.531241 |
| F  | 4.154200  | -2.896693 | -2.626002 |
| O  | 2.444538  | -2.842179 | 0.797376  |
| F  | 4.415415  | -4.331425 | -0.992778 |
| F  | 2.456127  | -4.105539 | -1.947991 |
| H  | 0.800588  | 3.057085  | -2.294846 |
| H  | 2.608009  | 4.556135  | -3.045593 |
| H  | 4.761958  | 4.649462  | -1.799716 |
| H  | 5.098279  | 3.238510  | 0.194777  |
| H  | 5.311007  | 1.892371  | 1.783754  |
| H  | 5.377587  | 0.262259  | 3.653391  |
| H  | 3.342008  | -1.150555 | 4.114710  |
| H  | 1.314529  | -0.812390 | 2.684364  |
| H  | -3.673790 | 2.677065  | -2.154858 |
| H  | -2.436623 | 0.933814  | -3.933752 |
| H  | -1.482152 | 2.823513  | 0.971646  |
| H  | -2.332874 | 4.006481  | -0.058371 |
| H  | -3.241727 | 2.641235  | 0.669451  |
| H  | 0.746614  | -0.388503 | -2.265984 |
| H  | -0.609585 | -1.097277 | -3.186095 |
| H  | 0.303589  | 0.287067  | -3.862320 |
| H  | -2.134621 | 1.102468  | 2.541080  |
| H  | -1.581461 | -0.294071 | 3.467117  |
| H  | -0.485374 | 1.069518  | 3.168135  |

|   |           |           |           |
|---|-----------|-----------|-----------|
| H | 0.063008  | -1.902140 | -0.575167 |
| H | -0.483806 | -3.298746 | 0.320632  |
| H | -1.646905 | -2.457482 | -0.744160 |
| H | -2.236717 | -3.008667 | 1.698052  |
| H | -3.499090 | -1.357921 | 1.769350  |

## PCC2

65

|    |           |           |           |
|----|-----------|-----------|-----------|
| N  | 1.757431  | 1.772767  | 1.543117  |
| C  | 0.618118  | 1.037379  | 1.478724  |
| N  | 0.432959  | 0.526149  | 2.721649  |
| C  | 1.459875  | 0.935284  | 3.558370  |
| C  | 2.291375  | 1.715566  | 2.819957  |
| AU | -0.552154 | 0.754484  | -0.134334 |
| C  | 0.760534  | -0.827995 | -0.682607 |
| C  | 0.697093  | -2.077130 | 0.154147  |
| C  | -0.681560 | -0.322278 | 3.157010  |
| C  | 2.346369  | 2.540342  | 0.448778  |
| C  | -1.827718 | 2.356794  | 0.266255  |
| C  | -2.842897 | 2.497970  | -0.709745 |
| C  | -3.775051 | 3.542814  | -0.612051 |
| C  | -3.707995 | 4.446592  | 0.444671  |
| C  | -2.709958 | 4.311585  | 1.411161  |
| C  | -1.777116 | 3.272661  | 1.317317  |
| C  | -2.873872 | 1.500600  | -1.782415 |
| N  | -1.865070 | 0.576446  | -1.756437 |
| C  | -1.825634 | -0.427829 | -2.651658 |
| C  | -2.773164 | -0.546322 | -3.657077 |
| C  | -3.797471 | 0.394573  | -3.721974 |
| C  | -3.847388 | 1.415113  | -2.781888 |
| C  | 1.623667  | -0.658162 | -1.691495 |
| C  | 1.759612  | 0.467538  | -2.666610 |
| O  | 2.612312  | -1.657798 | -2.013085 |
| O  | 4.815052  | -0.543254 | -1.401433 |
| S  | 5.119012  | -0.549401 | 0.136420  |
| O  | 4.213505  | -1.428925 | 0.849004  |
| C  | 6.805257  | -1.396374 | 0.118250  |
| F  | 7.672175  | -0.707053 | -0.639191 |
| O  | 5.361674  | 0.803005  | 0.594085  |
| F  | 7.265045  | -1.453719 | 1.379804  |
| F  | 6.686287  | -2.643961 | -0.367475 |
| O  | -2.761970 | -0.951312 | 0.936690  |
| S  | -3.407589 | -1.955705 | 0.055057  |
| O  | -4.495591 | -1.432569 | -0.771772 |
| C  | -4.274344 | -3.072490 | 1.298846  |
| F  | -5.174768 | -2.376371 | 2.033220  |
| O  | -2.457766 | -2.854964 | -0.618578 |
| F  | -4.927677 | -4.081294 | 0.680757  |
| F  | -3.377314 | -3.622837 | 2.159747  |
| H  | -1.010134 | 3.187713  | 2.088272  |
| H  | -2.657905 | 5.014860  | 2.243011  |
| H  | -4.437051 | 5.252916  | 0.516792  |
| H  | -4.562673 | 3.653962  | -1.356958 |
| H  | -4.659378 | 2.137486  | -2.799188 |
| H  | -4.569520 | 0.319408  | -4.486652 |

|   |           |           |           |
|---|-----------|-----------|-----------|
| H | -2.716689 | -1.383181 | -4.348736 |
| H | -1.018246 | -1.144004 | -2.525835 |
| H | 3.216909  | 2.213540  | 3.075793  |
| H | 1.510362  | 0.624975  | 4.593464  |
| H | 1.781769  | 2.328055  | -0.461701 |
| H | 2.284706  | 3.612080  | 0.671883  |
| H | 3.392522  | 2.242774  | 0.317899  |
| H | -1.334484 | -0.557647 | 2.306895  |
| H | -0.281560 | -1.251186 | 3.578593  |
| H | -1.261164 | 0.207938  | 3.921315  |
| H | 2.756785  | 0.930751  | -2.621264 |
| H | 1.624469  | 0.100911  | -3.695390 |
| H | 1.004285  | 1.237027  | -2.475876 |
| H | -0.340079 | -2.439198 | 0.213485  |
| H | 1.290275  | -2.927184 | -0.232637 |
| H | 1.059923  | -1.895446 | 1.176092  |
| H | 2.447691  | -2.412985 | -1.410811 |
| H | 3.936853  | -1.082306 | -1.636383 |

**IC**

65

|    |           |           |           |
|----|-----------|-----------|-----------|
| C  | 1.482972  | 3.819108  | 2.145408  |
| C  | 0.728540  | 2.958678  | 1.336090  |
| C  | 0.581661  | 1.608324  | 1.727692  |
| C  | 1.208746  | 1.130851  | 2.871035  |
| C  | 1.961442  | 2.006687  | 3.661919  |
| C  | 2.089567  | 3.348125  | 3.305129  |
| C  | 0.132047  | 3.358903  | 0.065370  |
| N  | -0.551297 | 2.368153  | -0.571829 |
| C  | -1.103061 | 2.557240  | -1.780161 |
| C  | -1.022743 | 3.786269  | -2.419240 |
| C  | -0.344831 | 4.827170  | -1.784472 |
| C  | 0.235611  | 4.613416  | -0.540767 |
| AU | -0.543058 | 0.537180  | 0.426143  |
| O  | -1.768759 | -0.393965 | -1.102093 |
| S  | -3.163954 | -0.930909 | -0.797694 |
| C  | -3.620622 | -1.532140 | -2.528563 |
| F  | -4.867703 | -2.037777 | -2.496085 |
| C  | -0.544023 | -1.163581 | 1.513436  |
| N  | -1.169880 | -1.369752 | 2.698857  |
| C  | -0.975617 | -2.677430 | 3.102177  |
| C  | -0.209016 | -3.277932 | 2.150300  |
| N  | 0.049467  | -2.331574 | 1.178912  |
| C  | -2.010979 | -0.401008 | 3.407338  |
| C  | 0.782881  | -2.613141 | -0.061630 |
| O  | -4.123367 | 0.134698  | -0.500698 |
| O  | -3.165079 | -2.106581 | 0.058497  |
| F  | -3.586937 | -0.513156 | -3.409609 |
| F  | -2.770630 | -2.490994 | -2.935508 |
| O  | -4.932948 | 0.542448  | 2.208653  |
| O  | 1.427052  | 0.187726  | -1.538235 |
| S  | 2.772771  | 0.662314  | -1.114966 |
| O  | 3.370922  | -0.139176 | -0.039521 |
| O  | 2.884255  | 2.117026  | -0.982966 |
| C  | 3.832522  | 0.257677  | -2.622070 |
| F  | 3.388726  | 0.913234  | -3.721059 |
| F  | 5.119920  | 0.616955  | -2.411856 |
| F  | 3.808052  | -1.071227 | -2.891206 |

|   |           |           |           |
|---|-----------|-----------|-----------|
| C | 4.692225  | -3.018722 | 1.357480  |
| C | 4.005380  | -4.281418 | 1.122110  |
| C | 3.455220  | -5.341575 | 0.912873  |
| C | 2.834799  | -6.632326 | 0.642781  |
| H | 1.142817  | 0.083066  | 3.152928  |
| H | 2.457229  | 1.626472  | 4.554684  |
| H | 2.680330  | 4.024445  | 3.921155  |
| H | 1.614151  | 4.860791  | 1.855659  |
| H | 0.789675  | 5.406976  | -0.046034 |
| H | -0.257440 | 5.800676  | -2.265207 |
| H | -1.477117 | 3.912325  | -3.399019 |
| H | -1.603035 | 1.695288  | -2.215912 |
| H | 0.186063  | -4.282296 | 2.082286  |
| H | -1.398462 | -3.061196 | 4.020673  |
| H | 1.112576  | -1.673077 | -0.517938 |
| H | 1.651885  | -3.235063 | 0.180665  |
| H | 0.116212  | -3.142970 | -0.751538 |
| H | -2.122319 | -0.740106 | 4.441728  |
| H | -1.520997 | 0.577126  | 3.402430  |
| H | -3.000999 | -0.319276 | 2.937258  |
| H | -4.757515 | 0.405430  | 1.250846  |
| H | -5.808704 | 0.148696  | 2.350089  |
| H | 5.730560  | -3.071143 | 0.999730  |
| H | 4.206703  | -2.180341 | 0.836086  |
| H | 4.723215  | -2.778317 | 2.430100  |
| H | 2.011930  | -6.544188 | -0.081887 |
| H | 2.427811  | -7.086552 | 1.558260  |
| H | 3.564816  | -7.339262 | 0.222504  |

## ICH20

65

|    |           |           |           |
|----|-----------|-----------|-----------|
| C  | -1.996181 | -3.618418 | 1.899912  |
| C  | -1.353552 | -2.683227 | 1.078122  |
| C  | -0.996356 | -1.426668 | 1.619751  |
| C  | -1.304425 | -1.116066 | 2.938478  |
| C  | -1.952366 | -2.062564 | 3.741736  |
| C  | -2.289778 | -3.312460 | 3.225364  |
| C  | -1.071612 | -2.908323 | -0.337139 |
| N  | -0.471360 | -1.859826 | -0.964509 |
| C  | -0.189934 | -1.889308 | -2.274933 |
| C  | -0.478319 | -3.008109 | -3.043972 |
| C  | -1.079173 | -4.105170 | -2.428505 |
| C  | -1.379155 | -4.054885 | -1.072463 |
| AU | -0.077532 | -0.231184 | 0.268206  |
| O  | 0.900513  | 0.788594  | -1.356216 |
| C  | 0.343632  | 1.225233  | 1.606540  |
| N  | 1.331338  | 1.174768  | 2.537092  |
| C  | 1.322523  | 2.332101  | 3.293632  |
| C  | 0.312122  | 3.110445  | 2.817478  |
| N  | -0.282236 | 2.415135  | 1.779946  |
| C  | 2.238484  | 0.044484  | 2.762753  |
| C  | -1.427959 | 2.917445  | 1.012478  |
| O  | 3.363650  | 0.332479  | -1.668682 |
| S  | 3.847981  | -0.951169 | -1.062741 |
| O  | 2.938756  | -1.449864 | -0.016900 |

|   |           |           |           |
|---|-----------|-----------|-----------|
| O | 4.367217  | -1.916787 | -2.013662 |
| C | 5.358893  | -0.358443 | -0.107335 |
| F | 5.007559  | 0.607291  | 0.790499  |
| F | 5.916129  | -1.376462 | 0.579907  |
| F | 6.286232  | 0.161027  | -0.933658 |
| O | -2.209989 | 0.819285  | -1.300074 |
| S | -3.545332 | 0.328227  | -0.845593 |
| O | -3.634461 | -1.128221 | -0.729313 |
| C | -4.626683 | 0.724832  | -2.336031 |
| F | -5.909334 | 0.370629  | -2.110616 |
| O | -4.123383 | 1.117836  | 0.243334  |
| F | -4.600545 | 2.053044  | -2.617186 |
| F | -4.193580 | 0.061268  | -3.436278 |
| C | 1.372256  | 3.799295  | -1.837701 |
| C | 0.253925  | 3.701775  | -2.303437 |
| C | -1.072850 | 3.606194  | -2.898790 |
| C | 2.736517  | 3.942595  | -1.342271 |
| H | 1.928814  | 0.613718  | -1.432446 |
| H | -1.065956 | -0.141273 | 3.358769  |
| H | -2.198562 | -1.810506 | 4.772982  |
| H | -2.796779 | -4.045221 | 3.851544  |
| H | -2.284585 | -4.588151 | 1.496348  |
| H | -1.862842 | -4.896315 | -0.582819 |
| H | -1.320110 | -4.996587 | -3.006256 |
| H | -0.233829 | -3.007454 | -4.103426 |
| H | 0.267092  | -0.991581 | -2.685097 |
| H | -0.029158 | 4.093314  | 3.114371  |
| H | 2.037433  | 2.502643  | 4.087527  |
| H | -1.667074 | 2.215850  | 0.205178  |
| H | -2.301731 | 2.997466  | 1.667521  |
| H | -1.170445 | 3.896490  | 0.594651  |
| H | 2.435965  | -0.467109 | 1.813333  |
| H | 3.179360  | 0.431429  | 3.164348  |
| H | 1.788091  | -0.654284 | 3.477639  |
| H | 0.749775  | 1.761527  | -1.482534 |
| H | 3.292691  | 4.664673  | -1.956455 |
| H | 2.754261  | 4.303665  | -0.304292 |
| H | 3.277994  | 2.986598  | -1.380275 |
| H | -0.997998 | 3.491674  | -3.989152 |
| H | -1.658991 | 4.513367  | -2.696116 |
| H | -1.629834 | 2.743360  | -2.504357 |

## TS

65

|   |           |           |           |
|---|-----------|-----------|-----------|
| C | 0.174719  | -2.616833 | -2.209500 |
| C | 0.051181  | -1.750384 | -1.114265 |
| C | 0.163449  | -0.368784 | -1.353421 |
| C | 0.387843  | 0.146262  | -2.615912 |
| C | 0.505182  | -0.745717 | -3.690161 |
| C | 0.398574  | -2.118589 | -3.486844 |
| C | -0.201051 | -2.192698 | 0.246658  |
| N | -0.296446 | -1.188827 | 1.165048  |
| C | -0.597822 | -1.452877 | 2.448542  |
| C | -0.792311 | -2.747675 | 2.898644  |
| C | -0.669936 | -3.795886 | 1.984326  |

|    |           |           |           |
|----|-----------|-----------|-----------|
| C  | -0.375783 | -3.517110 | 0.659325  |
| AU | -0.006825 | 0.718854  | 0.376815  |
| O  | -2.129345 | 1.514859  | 1.824697  |
| C  | 0.229420  | 2.477999  | -0.583092 |
| N  | -0.766184 | 3.228921  | -1.120769 |
| C  | -0.228345 | 4.351405  | -1.722140 |
| C  | 1.122870  | 4.283003  | -1.561339 |
| N  | 1.390279  | 3.121910  | -0.860402 |
| C  | -2.202439 | 2.921390  | -1.078883 |
| C  | 2.741936  | 2.668381  | -0.508175 |
| O  | -3.923524 | -0.289047 | 1.276002  |
| S  | -3.875944 | -0.947456 | -0.061644 |
| O  | -3.195711 | -0.136058 | -1.083918 |
| O  | -3.533448 | -2.366001 | -0.024768 |
| C  | -5.686208 | -0.908645 | -0.583991 |
| F  | -6.141198 | 0.367437  | -0.644682 |
| F  | -5.838516 | -1.465750 | -1.805983 |
| F  | -6.458267 | -1.588320 | 0.291498  |
| O  | 3.016873  | -0.405393 | 0.312998  |
| S  | 3.872752  | -0.934049 | -0.787109 |
| O  | 3.571625  | -2.308902 | -1.177844 |
| C  | 5.554985  | -1.059483 | 0.059139  |
| F  | 6.497563  | -1.524728 | -0.788507 |
| O  | 4.100942  | 0.033572  | -1.865735 |
| F  | 5.965936  | 0.157930  | 0.510653  |
| F  | 5.505866  | -1.893126 | 1.129521  |
| C  | 0.696039  | 2.391064  | 2.565565  |
| C  | 1.374854  | 1.403368  | 2.807543  |
| C  | 2.285343  | 0.333774  | 3.184404  |
| C  | 0.020821  | 3.684126  | 2.495907  |
| H  | -2.852323 | 0.841798  | 1.568176  |
| H  | 0.488102  | 1.211447  | -2.800062 |
| H  | 0.693615  | -0.348010 | -4.686737 |
| H  | 0.501678  | -2.804917 | -4.325313 |
| H  | 0.101246  | -3.691791 | -2.055211 |
| H  | -0.297568 | -4.318649 | -0.069706 |
| H  | -0.818673 | -4.825866 | 2.304690  |
| H  | -1.043304 | -2.923573 | 3.941882  |
| H  | -0.681555 | -0.592175 | 3.107097  |
| H  | 1.912244  | 4.945897  | -1.890206 |
| H  | -0.848445 | 5.089660  | -2.213076 |
| H  | 2.697677  | 1.653982  | -0.093873 |
| H  | 3.356793  | 2.626687  | -1.412649 |
| H  | 3.178198  | 3.361617  | 0.219830  |
| H  | -2.364963 | 1.836952  | -1.119155 |
| H  | -2.640770 | 3.310524  | -0.154031 |
| H  | -2.675415 | 3.391389  | -1.946173 |
| H  | -2.067357 | 1.436518  | 2.791095  |
| H  | 0.072344  | 4.179803  | 3.475577  |
| H  | 0.502626  | 4.344977  | 1.761908  |
| H  | -1.033951 | 3.569910  | 2.218406  |
| H  | 1.783163  | -0.437917 | 3.782740  |
| H  | 3.099780  | 0.756274  | 3.790465  |
| H  | 2.727839  | -0.135407 | 2.290202  |

TSOTf-2-butyne

|    |           |           |           |
|----|-----------|-----------|-----------|
| C  | -3.720044 | 3.721593  | 1.023108  |
| C  | -3.055885 | 2.622572  | 0.455232  |
| C  | -1.915202 | 2.106200  | 1.114180  |
| C  | -1.466493 | 2.665059  | 2.304564  |
| C  | -2.148582 | 3.758155  | 2.851665  |
| C  | -3.269392 | 4.286592  | 2.211288  |
| C  | -3.486452 | 1.967042  | -0.777879 |
| N  | -2.717769 | 0.902150  | -1.149256 |
| C  | -2.988841 | 0.192207  | -2.257152 |
| C  | -4.058888 | 0.524843  | -3.077830 |
| C  | -4.862077 | 1.607200  | -2.725062 |
| C  | -4.577736 | 2.330061  | -1.571010 |
| AU | -1.117226 | 0.502466  | 0.135237  |
| O  | -1.518811 | -1.823815 | -0.335133 |
| S  | -2.848558 | -2.402784 | 0.098789  |
| O  | -3.216644 | -2.032782 | 1.465251  |
| C  | 0.450631  | 0.327670  | 1.397878  |
| N  | 0.645136  | -0.586453 | 2.379675  |
| C  | 1.874620  | -0.368207 | 2.976775  |
| C  | 2.438735  | 0.706184  | 2.363054  |
| N  | 1.540394  | 1.135980  | 1.405708  |
| C  | -0.257403 | -1.670979 | 2.767877  |
| C  | 1.777261  | 2.299851  | 0.548146  |
| C  | -2.425043 | -4.241507 | 0.180708  |
| F  | -1.454116 | -4.470798 | 1.098189  |
| O  | -3.881841 | -2.311268 | -0.926602 |
| F  | -3.517039 | -4.944737 | 0.533877  |



|   |           |           |           |
|---|-----------|-----------|-----------|
| F | -1.990671 | -4.687492 | -1.015391 |
| C | 0.432989  | 0.576756  | -2.182791 |
| C | 0.227188  | 1.863856  | -2.844255 |
| C | 0.818539  | -0.516298 | -1.792115 |
| C | 1.417197  | -1.794989 | -1.448269 |
| O | 4.907353  | 1.333930  | 0.620513  |
| S | 4.875960  | 0.149728  | -0.254811 |
| C | 6.671887  | -0.420189 | -0.298854 |
| F | 7.474886  | 0.548281  | -0.797803 |
| O | 4.583047  | 0.443603  | -1.674081 |
| O | 4.155075  | -1.009865 | 0.289717  |
| F | 7.106304  | -0.723099 | 0.948395  |
| F | 6.812089  | -1.522145 | -1.070441 |
| O | 3.345778  | 2.759845  | -2.489499 |
| H | -0.597612 | 2.266967  | 2.822277  |
| H | -1.794716 | 4.191961  | 3.786629  |
| H | -3.795526 | 5.137447  | 2.641335  |
| H | -4.600994 | 4.134528  | 0.532808  |
| H | -5.199212 | 3.174092  | -1.281877 |
| H | -5.713344 | 1.886359  | -3.344749 |
| H | -4.258014 | -0.072793 | -3.963850 |
| H | -2.331662 | -0.649760 | -2.457218 |
| H | 3.423834  | 1.150307  | 2.441959  |
| H | 2.253387  | -1.019987 | 3.752137  |
| H | 0.871847  | 2.504288  | -0.025537 |
| H | 2.015382  | 3.161431  | 1.180904  |
| H | 2.616616  | 2.110966  | -0.127979 |
| H | -1.259445 | -1.495611 | 2.366927  |
| H | 0.119734  | -2.622820 | 2.379328  |

|   |           |           |           |
|---|-----------|-----------|-----------|
| H | -0.303374 | -1.711975 | 3.861263  |
| H | -0.450139 | 2.525842  | -2.287792 |
| H | 1.201928  | 2.370061  | -2.941513 |
| H | -0.199086 | 1.719369  | -3.847088 |
| H | 0.692203  | -2.456579 | -0.960392 |
| H | 1.760392  | -2.283974 | -2.371451 |
| H | 2.297948  | -1.647079 | -0.803411 |
| H | 4.043188  | 3.420547  | -2.624998 |
| H | 3.840635  | 1.938942  | -2.225603 |

TSOTf-H2O

65

|    |              |              |              |
|----|--------------|--------------|--------------|
| C  | -0.376427551 | -3.996451583 | -1.007445179 |
| C  | -0.434426969 | -2.857268563 | -0.205186054 |
| N  | -0.678801359 | -1.647817248 | -0.784342021 |
| C  | -0.844008665 | -1.518879065 | -2.109564837 |
| C  | -0.788360722 | -2.627084999 | -2.943875983 |
| C  | -0.552096619 | -3.879219807 | -2.381668490 |
| C  | -0.237323751 | -2.799222005 | 1.239420040  |
| C  | -0.227896166 | -1.521914201 | 1.843328065  |
| C  | -0.061488821 | -1.382662216 | 3.215319564  |
| C  | 0.110838453  | -2.524742602 | 4.007237804  |
| C  | 0.113275424  | -3.792092229 | 3.426566655  |
| C  | -0.061629414 | -3.927065625 | 2.052648016  |
| AU | -0.531948309 | -0.031692991 | 0.500840497  |
| C  | -0.126496933 | 1.440349868  | 1.829245061  |
| N  | -0.965838553 | 2.253097735  | 2.519712186  |

|   |              |              |              |
|---|--------------|--------------|--------------|
| C | -0.233217589 | 3.140532394  | 3.288390027  |
| C | 1.081376167  | 2.866623025  | 3.071103373  |
| N | 1.132400891  | 1.813728779  | 2.177330752  |
| C | -2.429375212 | 2.186592955  | 2.545224059  |
| C | 2.383173765  | 1.176123688  | 1.749952317  |
| O | 0.739547824  | 1.040019644  | -1.355764910 |
| O | 3.102900875  | -0.076042502 | -1.870285313 |
| S | 3.253707982  | -1.440984835 | -1.293532620 |
| O | 3.126937334  | -2.537532001 | -2.245399376 |
| C | 5.072468781  | -1.456248491 | -0.796464471 |
| F | 5.405921509  | -2.638761827 | -0.233153105 |
| O | 2.544485724  | -1.600703417 | -0.011229284 |
| F | 5.875514931  | -1.253228528 | -1.862595966 |
| F | 5.332595968  | -0.475968579 | 0.113250644  |
| O | -1.971835795 | 1.369380112  | -0.728334596 |
| S | -3.414268351 | 0.975106872  | -0.975142048 |
| C | -3.810995694 | 2.074325805  | -2.457848769 |
| F | -3.647577894 | 3.381475135  | -2.149156284 |
| O | -4.317499872 | 1.432717458  | 0.078541415  |
| O | -3.578983051 | -0.388297952 | -1.463768869 |
| F | -3.005339908 | 1.780828957  | -3.501887032 |
| F | -5.089462453 | 1.883320311  | -2.836303674 |
| C | 2.206733167  | 3.888892399  | -1.804644523 |
| C | 1.076387566  | 4.290285780  | -1.618835878 |
| C | -0.274158895 | 4.805579298  | -1.430293659 |
| C | 3.563360210  | 3.419513430  | -2.056631648 |
| H | 1.638545320  | 0.625952352  | -1.537280315 |
| H | -0.062201513 | -0.403984800 | 3.689712083  |
| H | 0.242137503  | -2.412771524 | 5.083376979  |
| H | 0.250278369  | -4.677513154 | 4.045531513  |

|   |              |              |              |
|---|--------------|--------------|--------------|
| H | -0.062522508 | -4.920215234 | 1.604973342  |
| H | -0.164867716 | -4.963167409 | -0.557520324 |
| H | -0.488224095 | -4.763014314 | -3.014666346 |
| H | -0.917376723 | -2.495194741 | -4.015095834 |
| H | -1.003474836 | -0.508962823 | -2.475773401 |
| H | -0.710775411 | 3.889997512  | 3.905342877  |
| H | 1.977734816  | 3.331183713  | 3.459899590  |
| H | -2.812989243 | 1.771150927  | 1.610099330  |
| H | -2.757430793 | 1.571507353  | 3.391708217  |
| H | -2.820063574 | 3.202561956  | 2.658316790  |
| H | 2.193661786  | 0.475948282  | 0.931258372  |
| H | 3.082985105  | 1.949517779  | 1.419305416  |
| H | 2.811152460  | 0.621190995  | 2.592477904  |
| H | 0.871227325  | 2.009369434  | -1.443286114 |
| H | 3.919889065  | 3.772172207  | -3.034713993 |
| H | 4.261138347  | 3.793447741  | -1.293647975 |
| H | 3.617662595  | 2.321117584  | -2.057107231 |
| H | -0.654818187 | 5.250439420  | -2.360319375 |
| H | -0.296841454 | 5.584067305  | -0.654189615 |
| H | -0.973462571 | 4.010010957  | -1.137588552 |

ICTFA

63

|   |           |          |           |
|---|-----------|----------|-----------|
| N | 0.961804  | 2.166948 | -0.565557 |
| C | 0.084059  | 1.314884 | -1.143923 |
| N | -0.217897 | 1.838646 | -2.357712 |
| C | 0.479524  | 3.019600 | -2.542738 |

|    |           |           |           |
|----|-----------|-----------|-----------|
| C  | 1.222320  | 3.221446  | -1.420647 |
| AU | -0.637124 | -0.372745 | -0.306770 |
| O  | -1.638272 | 0.773212  | 1.206348  |
| C  | -2.547143 | 1.607043  | 0.827290  |
| C  | -1.206449 | 1.320810  | -3.303072 |
| C  | 1.511717  | 2.060561  | 0.790111  |
| C  | 0.161331  | -1.664071 | -1.653087 |
| C  | -0.246672 | -3.002422 | -1.435524 |
| C  | 0.218827  | -4.010357 | -2.295578 |
| C  | 1.081952  | -3.700354 | -3.340366 |
| C  | 1.505406  | -2.382743 | -3.523337 |
| C  | 1.051395  | -1.365753 | -2.677992 |
| C  | -1.086366 | -3.264513 | -0.270517 |
| N  | -1.421491 | -2.154000 | 0.445477  |
| C  | -2.123548 | -2.238669 | 1.586307  |
| C  | -2.568121 | -3.461336 | 2.069204  |
| C  | -2.262992 | -4.615497 | 1.346138  |
| C  | -1.518406 | -4.518080 | 0.177458  |
| C  | -3.233705 | 2.292315  | 2.061484  |
| F  | -2.321869 | 2.891692  | 2.866540  |
| O  | -2.918812 | 1.889170  | -0.308565 |
| F  | -4.125474 | 3.228074  | 1.678189  |
| F  | -3.899882 | 1.364939  | 2.804679  |
| O  | 1.318543  | -1.204489 | 1.372466  |
| C  | 2.469119  | -1.247385 | 0.846261  |
| C  | 3.438487  | -2.268069 | 1.560420  |
| F  | 3.861821  | -1.766483 | 2.760428  |
| O  | 2.943890  | -0.600426 | -0.105947 |
| F  | 2.829797  | -3.462431 | 1.820499  |
| F  | 4.550958  | -2.547415 | 0.834105  |

|   |           |           |           |
|---|-----------|-----------|-----------|
| O | -3.321132 | 3.680047  | -2.436916 |
| C | 5.308469  | 1.702366  | -0.890936 |
| C | 5.046637  | 3.018147  | -0.323139 |
| C | 4.851168  | 4.111851  | 0.163339  |
| C | 4.662398  | 5.425170  | 0.766631  |
| H | 1.425459  | -0.354117 | -2.811165 |
| H | 2.208073  | -2.140715 | -4.320508 |
| H | 1.442042  | -4.488689 | -3.999888 |
| H | -0.084425 | -5.045128 | -2.138731 |
| H | -1.252798 | -5.411057 | -0.383128 |
| H | -2.594625 | -5.590823 | 1.700378  |
| H | -3.134098 | -3.499679 | 2.996985  |
| H | -2.311213 | -1.297142 | 2.099348  |
| H | 1.927853  | 3.998918  | -1.159348 |
| H | 0.372041  | 3.611248  | -3.441594 |
| H | 1.402437  | 1.028909  | 1.138577  |
| H | 2.572558  | 2.328320  | 0.755950  |
| H | 0.967458  | 2.746494  | 1.449960  |
| H | -0.734531 | 1.173038  | -4.281139 |
| H | -1.575871 | 0.364234  | -2.926723 |
| H | -2.037278 | 2.033376  | -3.377990 |
| H | -3.330306 | 3.155029  | -1.606597 |
| H | -4.153962 | 4.177251  | -2.424978 |
| H | 6.290691  | 1.330951  | -0.565106 |
| H | 4.555142  | 0.959858  | -0.583778 |
| H | 5.317196  | 1.741792  | -1.990011 |
| H | 3.787952  | 5.445681  | 1.433681  |
| H | 4.518240  | 6.204418  | 0.003751  |
| H | 5.537935  | 5.711440  | 1.367382  |

RC TFA

63

|    |           |           |           |
|----|-----------|-----------|-----------|
| N  | 1.905011  | 2.135657  | 0.713100  |
| C  | 1.078180  | 1.083992  | 0.953123  |
| N  | 1.417081  | 0.608533  | 2.172304  |
| C  | 2.473320  | 1.336804  | 2.682866  |
| C  | 2.776870  | 2.299940  | 1.775273  |
| AU | -0.399376 | 0.441109  | -0.279521 |
| C  | 0.900091  | -1.585916 | -0.842733 |
| C  | 0.865845  | -2.771263 | -0.007910 |
| C  | 0.864398  | -0.567162 | 2.852048  |
| C  | 1.926017  | 2.975592  | -0.479047 |
| C  | -1.655167 | 1.986689  | 0.241795  |
| C  | -2.839623 | 2.006577  | -0.530098 |
| C  | -3.787986 | 3.015409  | -0.297952 |
| C  | -3.573591 | 3.975031  | 0.685889  |
| C  | -2.411740 | 3.932351  | 1.456973  |
| C  | -1.452054 | 2.938153  | 1.235799  |
| C  | -3.033780 | 0.932904  | -1.503723 |
| N  | -1.999422 | 0.047233  | -1.597310 |
| C  | -2.081772 | -1.033371 | -2.390517 |
| C  | -3.194748 | -1.264541 | -3.188864 |
| C  | -4.255485 | -0.364283 | -3.132441 |
| C  | -4.178022 | 0.733441  | -2.282288 |
| C  | 1.101304  | -0.707056 | -1.687249 |
| C  | 1.593718  | 0.003464  | -2.863785 |
| O  | -1.865327 | -0.978562 | 1.370146  |

|   |           |           |           |
|---|-----------|-----------|-----------|
| C | -2.536393 | -1.973472 | 0.954899  |
| C | -3.672253 | -2.412091 | 1.954324  |
| F | -4.306765 | -1.348476 | 2.520886  |
| O | -2.412050 | -2.649262 | -0.079855 |
| F | -4.624219 | -3.172642 | 1.362307  |
| F | -3.138039 | -3.149824 | 2.973795  |
| O | 3.548258  | -1.351171 | 1.336097  |
| C | 4.101076  | -1.509823 | 0.227237  |
| O | 3.958670  | -2.407113 | -0.638640 |
| C | 5.104049  | -0.350529 | -0.170945 |
| F | 6.038340  | -0.715470 | -1.081553 |
| F | 4.395473  | 0.699757  | -0.746770 |
| F | 5.766534  | 0.182982  | 0.887898  |
| O | 3.731088  | -2.231362 | -3.327891 |
| H | -0.559305 | 2.918296  | 1.857451  |
| H | -2.246691 | 4.672168  | 2.240207  |
| H | -4.318972 | 4.749971  | 0.859384  |
| H | -4.706227 | 3.046194  | -0.883658 |
| H | -5.009210 | 1.430017  | -2.206535 |
| H | -5.148134 | -0.523985 | -3.736100 |
| H | -3.225072 | -2.150120 | -3.818955 |
| H | -1.232461 | -1.709857 | -2.372270 |
| H | 3.550619  | 3.055307  | 1.770911  |
| H | 2.935155  | 1.079478  | 3.625908  |
| H | 1.065377  | 2.721062  | -1.102954 |
| H | 1.859664  | 4.029537  | -0.186382 |
| H | 2.855429  | 2.802451  | -1.032972 |
| H | -0.086175 | -0.847156 | 2.384055  |
| H | 1.604244  | -1.371790 | 2.775162  |
| H | 0.687928  | -0.308360 | 3.901571  |



|   |           |           |           |
|---|-----------|-----------|-----------|
| H | 2.096434  | 0.939466  | -2.593836 |
| H | 2.346670  | -0.663105 | -3.330818 |
| H | 0.789347  | 0.225277  | -3.578060 |
| H | -0.160554 | -3.024926 | 0.282242  |
| H | 1.296070  | -3.587617 | -0.607164 |
| H | 1.531314  | -2.631342 | 0.854766  |
| H | 4.609581  | -2.245179 | -3.739109 |
| H | 3.917865  | -2.302438 | -2.346893 |

ICH2O TFA

63

|    |              |              |              |
|----|--------------|--------------|--------------|
| N  | 1.735790527  | -2.104317821 | 0.616770701  |
| C  | 1.001737688  | -0.966224036 | 0.669022622  |
| N  | 1.755752714  | -0.052947163 | 1.324273359  |
| C  | 2.977348580  | -0.605959773 | 1.661961347  |
| C  | 2.964202997  | -1.892690912 | 1.216851118  |
| AU | -0.812926159 | -0.685621395 | -0.158023557 |
| O  | -0.025440267 | 0.561949301  | -1.642965242 |
| C  | 1.403673129  | 1.351944542  | 1.545345801  |
| C  | 1.374287493  | -3.317586367 | -0.118299653 |
| N  | -2.712285463 | -0.556654831 | -1.018557107 |
| C  | -3.690423761 | -1.205834059 | -0.324764860 |
| C  | -5.007857803 | -1.142474251 | -0.789593820 |
| C  | -5.299538847 | -0.426502115 | -1.945353616 |
| C  | -4.273934871 | 0.217680839  | -2.636847858 |
| C  | -2.979648264 | 0.129919076  | -2.140973180 |
| C  | -3.221073379 | -1.915240532 | 0.866051217  |
| C  | -1.834699998 | -1.846820726 | 1.157522522  |

|   |              |              |              |
|---|--------------|--------------|--------------|
| C | -1.341852819 | -2.486001266 | 2.292669343  |
| C | -2.203151433 | -3.205808723 | 3.128249299  |
| C | -3.566350539 | -3.280542865 | 2.840861435  |
| C | -4.073126363 | -2.634486570 | 1.717381260  |
| O | 2.449614771  | 0.618851712  | -1.831493414 |
| C | 2.984577416  | -0.480730902 | -2.197740529 |
| O | 2.469029447  | -1.585785381 | -2.399719359 |
| C | 4.537135512  | -0.351428482 | -2.410688513 |
| F | 5.137399404  | -1.554491377 | -2.568804679 |
| F | 4.822267106  | 0.393391969  | -3.511612821 |
| F | 5.143391214  | 0.255513746  | -1.343027655 |
| O | -1.111657063 | 2.790250254  | -1.074638830 |
| C | -1.708000926 | 2.732232965  | 0.039204115  |
| O | -1.749282539 | 1.802769692  | 0.874198936  |
| C | -2.476719884 | 4.048555145  | 0.417004879  |
| F | -3.146645990 | 4.569184027  | -0.644399899 |
| F | -3.381285901 | 3.856340926  | 1.408121685  |
| F | -1.594162123 | 4.995598791  | 0.849828561  |
| C | 5.477615318  | 1.986104063  | 2.595591277  |
| C | 5.514024139  | 1.336452324  | 3.618438152  |
| C | 5.591285350  | 0.583298328  | 4.863260755  |
| C | 5.458603193  | 2.782957208  | 1.376444000  |
| H | 1.059358587  | 0.561091019  | -1.736347965 |
| H | -0.284694203 | -2.428156668 | 2.545674808  |
| H | -1.802854756 | -3.703899034 | 4.011384399  |
| H | -4.235963425 | -3.835836581 | 3.496261276  |
| H | -5.140807894 | -2.688145927 | 1.506067803  |
| H | -5.798848764 | -1.649236741 | -0.241931085 |
| H | -6.326229138 | -0.370427811 | -2.305479117 |
| H | -4.463561414 | 0.788358376  | -3.542940426 |

|   |              |              |              |
|---|--------------|--------------|--------------|
| H | -2.125093339 | 0.606171704  | -2.619625615 |
| H | 3.746056041  | -0.029114777 | 2.168457010  |
| H | 3.721125911  | -2.664120990 | 1.255085457  |
| H | 0.313870696  | 1.463537700  | 1.515397460  |
| H | 1.789626377  | 1.660742270  | 2.521590207  |
| H | 1.856248763  | 1.960795538  | 0.754215407  |
| H | 1.640673806  | -3.172172624 | -1.172800052 |
| H | 1.926751068  | -4.159876214 | 0.309023552  |
| H | 0.299908502  | -3.494304802 | -0.013469366 |
| H | -0.384451580 | 1.519256835  | -1.406303263 |
| H | 4.922104174  | 3.729933310  | 1.530074254  |
| H | 6.480784644  | 3.026490250  | 1.054043856  |
|   |              |              |              |
| H | 4.971352118  | 2.249575159  | 0.548915088  |
| H | 5.335288199  | 1.215411784  | 5.725660807  |
| H | 6.606038694  | 0.192625642  | 5.026143111  |
| H | 4.902548626  | -0.274484531 | 4.865862126  |

## References

---

<sup>1</sup> Hintermann, L. Expedient Syntheses of the N-Heterocyclic Carbene Precursor Imidazolium Salts IPr · HCl , IMes · HCl and IXy · HCl. *Beilstein J. Org. Chem.* **2007**, 3 (22), 2–6.

- 
- <sup>2</sup> Janzen, D. E.; Doherty, S. R.; Vanderveer, D. G.; Hinkle, L. M.; Benefield, D. A.; Vashi, H. M.; Grant, G. J. Cyclometallated Gold(III) Complexes with a Trithiacrown Ligand: Solventless Au(III) Cyclometallation, Intramolecular Gold-Sulfur Interactions, and Fluxional Behavior in 1,4,7-Trithiacyclononane Au(III) Complexes. *J. Organomet. Chem.* **2014**, *755*, 47–57.
- <sup>3</sup> SCM, Theoretical Chemistry, *ADF User's Guide. Release 2014.05*, Vrije Universiteit, Amsterdam, The Netherlands, 2014. <http://www.scm.com>.
- <sup>4</sup> Fonseca Guerra, C.; Snijders, J.G.; te Velde, G.; Baerends, E.J. Towards an order-N DFT method. *Theor. Chem. Acc.* **1998**, *99*, 391-403.
- <sup>5</sup> te Velde, G.; Bickelhaupt, F.M.; Baerends, E.J.; Fonseca Guerra, C.; van Gisbergen, S.J.A.; Snijders, J.G.; Ziegler, T. Chemistry with ADF. *J. Comput. Chem.* **2001**, *22*, 931-967.
- <sup>6</sup> Swart, M.; Bickelhaupt, F.M. QUILD: quantum-regions interconnected by local descriptions. *J. Comput. Chem.* **2008**, *29*, 724-734.
- <sup>7</sup> Becke, A.D. Density-functional exchange-energy approximation with correct asymptotic behavior. *Phys. Rev. A* **1988**, *38*, 3098-3100.
- <sup>8</sup> Perdew, J.P. Density-functional approximation for the correlation energy of the inhomogeneous electron gas. *Phys. Rev. B* **1986**, *33*, 8822-8824.
- <sup>9</sup> van Lenthe, E.; Baerends, E.J.; Snijders, J.G. Relativistic regular two-component Hamiltonians. *J. Chem. Phys.* **1993**, *99*, 4597-4610.
- <sup>10</sup> van Lenthe, E.; Baerends, E.J.; Snijders, J.G. Relativistic total energy using regular approximations. *J. Chem. Phys.* **1994**, *101*, 9783-9792.
- <sup>11</sup> van Lenthe, E.; Ehlers, A.; Baerends, E.J. Geometry optimizations in the zero order regular approximation for relativistic effects. *J. Chem. Phys.* **1999**, *110*, 8943-8953.
- <sup>12</sup> Neese, F. The ORCA program system. *WIREs Comput. Mol. Sci.* **2012**, *2*, 73-78.
- <sup>13</sup> Grimme, S. Semiempirical hybrid density functional with perturbative second-order correlation. *J. Chem. Phys.* **2006**, *124*, 034108.
- <sup>14</sup> Ciancaleoni, G.; Rampino, S.; Zuccaccia, D.; Tarantelli, F.; Belanzoni, P.; Belpassi, L. An ab initio benchmark and DFT validation study on gold(I)-catalyzed hydroamination of alkynes. *J. Chem. Theory Comput.* **2014**, *10*, 1021-1034.
- <sup>15</sup> Kang, R.; Chen, H.; Shaik, S.; Yao, J. Assessment of theoretical methods for complexes of gold(I) and gold(III) with unsaturated aliphatic hydrocarbon: which density functional should we choose? *J. Chem. Theory Comput.* **2011**, *7*, 4002-4011.
- <sup>16</sup> Kang, R.; Lai, W.; Yao, J.; Shaik, S.; Chen, H. How accurate can a local coupled cluster approach be in computing the activation energies of late-transition-metal-catalyzed reactions with Au, Pt and Ir? *J. Chem. Theory Comput.* **2012**, *8*, 3119-3127.
- <sup>17</sup> Biasiolo, L.; Trinichillo, M.; Belanzoni, P.; Belpassi, L.; Busico, V.; Ciancaleoni, G.; D'Amora, A.; Macchioni, A.; Tarantelli, F.; Zuccaccia, D. Unexpected anion effect in the alkoxylation of alkynes catalyzed by N-Heterocyclic Carbene (NHC) cationic gold complexes. *Chem.-Eur. J.* **2014**, *20*, 14594-14598.
- <sup>18</sup> Ciancaleoni, G.; Belpassi, L.; Zuccaccia, D.; Tarantelli, F.; Belanzoni, P. Counterion effect in the reaction mechanism of NHC gold(I)-catalyzed alkoxylation of alkynes: computational insight into experiment. *ACS Catal.* **2015**, *5*, 803-814.
- <sup>19</sup> Gatto, M.; Belanzoni, P.; Belpassi, L.; Biasiolo, L.; Del Zotto, A.; Tarantelli, F.; Zuccaccia, D. Solvent-, silver-, and acid-free NHC-Au-X catalyzed hydration of alkynes. The pivotal role of the counterion. *ACS Catal.* **2016**, *6*, 7363-7376.

---

<sup>20</sup> Gatto, M.; Baratta, W.; Belanzoni, P.; Belpassi, L.; Del Zotto, A.; Tarantelli, F.; Zuccaccia, D. Hydration and alkoxylation of alkynes catalyzed by NHC-Au-OTf. *Green Chem.* **2018**, *20*, 2125-2134.

<sup>21</sup> Gregori, L.; Sorbelli, D.; Belpassi, L.; Tarantelli, F.; Belanzoni, P. Alkyne activation with gold(III) complexes: a quantitative assessment of the ligand effect by charge-displacement analysis. *Inorg. Chem.* **2019**, *58*, 3115-3129.

<sup>22</sup> Grimme, S.; Ehrlich, S.; Goerigk, L. *J. Comput. Chem.* **2011**, *32*, 1456-1465.

<sup>23</sup> Klamt, A.; Schüürmann, G. COSMO: a new approach to dielectric screening in solvents with explicit expressions for the screening Energy and its gradients. *J. Chem. Soc., Perkin Trans. 2* **1993**, *0*, 799-805.

<sup>24</sup> Klamt, A. Conductor-like screening model for real solvents: a new approach to the quantitative calculation of solvation phenomena. *J. Phys. Chem.* **1995**, *99*, 2224-2235.

<sup>25</sup> Klamt, A.; Jonas, V. Treatment of the outlying charge in continuum solvation models. *J. Chem. Phys.* **1996**, *105*, 9972-9981.
